# Supplementary material for: What did you choose just now? Chimpanzees’ short-term retention of memories of their own behavior
Source: PeerJ. 2014 Oct 23;2:e637. doi: 10.7717/peerj.637 (PMC4217185; doi:10.7717/peerj.637)
Supplement: Dataset S1 [file peerj-02-637-s001.xls]

## Sheet: Pendesa Test
Pendesa
"What-did-you-choose?" Test
							Visual Search				What-did-you-choose Test					%Cor			Response Time (ms)
					MTS		homoDSTs		heteroDSTs		homoDSTs		heteroDSTs				Visual Search			Visual Search
		Session	Date	Days from 1st session	Total	Cor	Total	Cor	Total	Cor	Total	Cor	Total	Cor		MTS	homoDSTs		MTS	homoDSTs	heteroDSTs
		1	2007-11-07	0	nc		16	15	8	8	0	0	0	0			93.8			825	1143
		2	2007-11-09	2	4	4	16	11	8	8	0	0	0	0		100	68.8		766	851	1174
		3	2007-11-14	7	4	4	16	14	8	8	0	0	0	0		100	87.5		645	783	888
		4	2007-11-16	9	4	4	16	11	8	8	1	1	0	0		100	68.8		941	788	703
		5	2007-11-29	22	4	3	16	10	8	8	0	0	0	0		75	62.5		938	633	611
		6	2007-12-04	27	4	4	16	11	8	8	0	0	0	0		100	68.8		770	695	670
		7	2007-12-06	29	4	4	16	6	8	8	0	0	0	0		100	37.5		547	799	1110
		8	2007-12-11	34	4	3	16	13	8	8	0	0	1	1		75	81.3		657	721	793
		9	2007-12-25	48	4	3	16	9	8	8	0	0	0	0		75	56.3		740	818	740
		10	2008-01-07	61	4	4	16	10	8	8	0	0	0	0		100	62.5		711	898	838
		11	2008-01-10	64	4	3	16	12	8	8	0	0	0	0		75	75		594	757	1025
		12	2008-01-16	70	4	4	16	13	8	8	1	1	0	0		100	81.3		672	829	1065
		13	2008-01-18	72	4	3	16	14	8	8	0	0	0	0		75	87.5		823	773	865
		14	2008-01-21	75	4	4	16	13	8	8	0	0	0	0		100	81.3		2211	864	973
		15	2008-01-22	76	4	4	16	14	8	8	0	0	0	0		100	87.5		812	1758	803
		16	2008-01-23	77	4	4	16	13	8	8	0	0	1	1		100	81.3		644	927	1024
		17	2008-01-29	83	4	4	16	13	8	8	0	0	0	0		100	81.3		594	840	1000
		18	2008-01-30	84	4	3	16	15	8	8	0	0	0	0		75	93.8		594	1137	1299
		19	2008-01-31	85	4	4	16	16	8	8	0	0	0	0		100	100		640	899	1164
		20	2008-02-01	86	4	3	16	14	8	8	1	1	0	0		75	87.5		719	991	1320
		21	2008-02-06	91	4	4	16	16	8	8	0	0	0	0		100	100		684	921	1461
		22	2008-02-07	92	4	4	16	14	8	8	0	0	0	0		100	87.5		820	912	1338
		23	2008-02-08	93	4	4	16	14	8	8	0	0	0	0		100	87.5		860	921	1006
		24	2008-02-12	97	4	4	16	15	8	8	0	0	1	0		100	93.8		726	1225	1359
		25	2008-02-15	100	4	4	16	16	8	8	0	0	0	0		100	100		859	1205	2088
		26	2008-02-18	103	4	2	16	16	8	8	0	0	0	0		50	100		742	1110	1158
		27	2008-02-20	105	4	4	16	15	8	8	0	0	0	0		100	93.8		723	1090	1147
		28	2008-02-21	106	4	4	16	15	8	8	1	0	0	0		100	93.8		496	997	1264
		29	2008-02-22	107	4	4	16	14	8	8	0	0	0	0		100	87.5		559	913	1127
		30	2008-02-25	110	4	3	16	16	8	8	0	0	0	0		75	100		724	1193	1480
		31	2008-02-26	111	4	4	16	16	8	8	0	0	0	0		100	100		601	1195	1469
		32	2008-02-29	114	4	4	16	16	8	8	0	0	1	1		100	100		719	1002	1656
		33	2008-03-03	117	4	4	16	15	8	8	0	0	0	0		100	93.8		961	838	1168
		34	2008-03-04	118	4	3	16	14	8	8	0	0	0	0		75	87.5		703	1068	996
		35	2008-03-05	119	4	4	16	14	8	8	0	0	0	0		100	87.5		664	787	922
		36	2008-03-06	120	4	4	16	14	8	8	1	1	0	0		100	87.5		613	1085	1014
		37	2008-03-07	121	4	4	16	11	8	8	0	0	0	0		100	68.8		777	1205	1377
		38	2008-03-10	124	4	4	16	15	8	8	0	0	0	0		100	93.8		727	838	1418
		39	2008-03-11	125	4	3	16	15	8	8	0	0	0	0		75	93.8		610	1174	1592
		40	2008-03-17	131	4	4	16	15	8	8	0	0	1	0		100	93.8		605	873	1607
		41	2008-04-01	146	4	3	16	14	8	8	0	0	0	0		75	87.5		646	900	1192
		42	2008-04-04	149	4	4	16	13	8	8	0	0	0	0		100	81.3		676	976	1369
		43	2008-04-07	152	4	3	16	15	8	8	0	0	0	0		75	93.8		682	996	1129
		44	2008-04-08	153	4	4	16	15	8	8	1	1	0	0		100	93.8		582	1007	1336
		45	2008-04-14	159	4	4	16	14	8	8	1	0	0	0		100	87.5		766	1069	1203
		46	2008-04-21	166	4	4	16	14	8	8	0	0	0	0		100	87.5		684	977	1344
		47	2008-04-22	167	4	4	16	15	8	8	0	0	0	0		100	93.8		629	882	1295
		48	2008-04-24	169	4	4	16	14	8	8	0	0	0	0		100	87.5		766	888	1453
		49	2008-05-01	176	4	4	16	16	8	8	0	0	1	1		100	100		1028	701	1193
		50	2008-05-02	177	4	4	16	14	8	8	0	0	0	0		100	87.5		539	972	1338
		51	2008-05-08	183	4	4	16	15	8	8	0	0	0	0		100	93.8		711	867	982
		52	2008-05-09	184	4	4	16	14	8	8	0	0	0	0		100	87.5		773	672	1149
		53	2008-05-12	187	4	4	16	14	8	8	1	0	0	0		100	87.5		551	776	992
		54	2008-05-13	188	4	4	16	15	8	8	0	0	0	0		100	93.8		500	832	776
		55	2008-05-16	191	4	4	16	15	8	8	0	0	0	0		100	93.8		817	775	658
		56	2008-05-19	194	4	4	16	15	8	8	0	0	0	0		100	93.8		559	783	826
		57	2008-05-20	195	4	4	16	16	8	8	0	0	1	0		100	100		891	871	988
		58	2008-05-22	197	4	4	16	15	8	8	0	0	0	0		100	93.8		644	795	789
		59	2008-05-23	198	4	4	16	15	8	8	0	0	0	0		100	93.8		516	769	922
		60	2008-05-27	202	4	4	16	16	8	8	0	0	0	0		100	100		559	811	900
		61	2008-06-02	208	4	3	16	15	8	8	0	0	0	0		75	93.8		708	888	1168
		62	2008-06-04	210	4	4	16	14	8	8	1	1	0	0		100	87.5		457	797	1025
		63	2008-06-09	215	4	4	16	15	8	8	0	0	0	0		100	93.8		563	865	1065
		64	2008-06-11	217	4	3	16	12	8	8	0	0	0	0		75	75		625	897	787
		65	2008-06-12	218	4	3	16	15	8	8	0	0	0	0		75	93.8		536	741	803
		66	2008-06-13	219	4	4	16	16	8	8	0	0	1	1		100	100		570	804	803
		67	2008-06-16	222	4	4	16	14	8	8	0	0	0	0		100	87.5		781	845	688
		68	2008-06-17	223	4	4	16	13	8	8	0	0	0	0		100	81.3		516	745	707
		69	2008-06-18	224	4	4	16	12	8	8	0	0	0	0		100	75		567	831	756
		70	2008-06-19	225	4	4	16	15	8	8	1	0	0	0		100	93.8		508	873	787
		71	2008-06-20	226	4	4	16	14	8	8	0	0	0	0		100	87.5		531	872	756
		72	2008-06-23	229	4	3	16	15	8	8	0	0	0	0		75	93.8		620	848	990
		73	2008-06-24	230	4	4	16	11	8	8	0	0	0	0		100	68.8		629	879	842
		74	2008-06-25	231	4	4	16	15	8	8	0	0	1	1		100	93.8		465	690	811
		75	2008-06-30	236	4	3	16	16	8	8	0	0	0	0		75	100		729	779	1141
		76	2008-07-01	237	4	4	16	12	8	8	0	0	0	0		100	75		570	1038	744
		77	2008-07-02	238	4	3	16	14	8	8	0	0	0	0		75	87.5		484	781	818
		78	2008-07-03	239	4	4	16	13	8	8	1	0	0	0		100	81.3		813	823	1184
		79	2008-07-07	243	4	4	16	12	8	8	0	0	0	0		100	75		606	849	820
		80	2008-07-08	244	4	4	16	16	8	8	0	0	0	0		100	100		629	830	822
		81	2008-07-09	245	4	4	16	16	8	8	0	0	0	0		100	100		484	906	1414
		82	2008-07-10	246	4	4	16	15	8	8	0	0	1	0		100	93.8		516	844	1041
		83	2008-07-11	247	4	4	16	15	8	8	0	0	0	0		100	93.8		555	741	1008
		84	2008-07-15	251	4	4	16	15	8	8	0	0	0	0		100	93.8		570	767	951
		85	2008-07-16	252	4	3	16	14	8	8	0	0	0	0		75	87.5		906	771	863
		86	2008-07-25	261	4	4	16	15	8	8	1	1	0	0		100	93.8		586	710	695
		87	2008-07-30	266	4	4	16	14	8	8	0	0	0	0		100	87.5		778	970	957
		88	2008-07-31	267	4	4	16	15	8	8	0	0	0	0		100	93.8		559	756	822
		89	2008-08-01	268	4	4	16	15	8	8	0	0	0	0		100	93.8		582	802	887
		90	2008-08-15	282	4	4	16	14	8	8	0	0	1	1		100	87.5		602	890	797
		91	2008-08-18	285	4	4	16	16	8	8	0	0	0	0		100	100		387	724	774
		92	2008-08-20	287	4	4	16	13	8	8	0	0	0	0		100	81.3		778	751	912
		93	2008-08-21	288	4	4	16	13	8	8	0	0	0	0		100	81.3		942	744	682
		94	2008-08-22	289	4	4	16	13	8	8	1	1	0	0		100	81.3		739	785	934
		95	2008-09-09	307	4	4	16	14	8	8	0	0	0	0		100	87.5		594	1023	767
		96	2008-09-10	308	4	3	16	16	8	8	0	0	0	0		75	100		536	811	853
		97	2008-09-11	309	4	4	16	16	8	8	0	0	0	0		100	100		770	828	848
		98	2008-09-17	315	4	4	16	15	8	8	0	0	1	1		100	93.8		742	757	894
		99	2008-09-18	316	4	4	16	14	8	8	0	0	0	0		100	87.5		539	715	826
		100	2008-09-19	317	4	4	16	15	8	8	0	0	0	0		100	93.8		535	814	916
		101	2008-09-22	320	4	4	16	14	8	8	0	0	0	0		100	87.5		641	758	971
		102	2008-09-24	322	4	4	16	13	8	8	1	1	0	0		100	81.3		879	849	674
		103	2008-09-30	328	4	4	16	16	8	8	0	0	0	0		100	100		504	705	721
		104	2008-10-02	330	4	4	16	14	8	8	0	0	0	0		100	87.5		586	810	644
		105	2008-10-06	334	4	4	16	15	8	8	0	0	0	0		100	93.8		672	810	748
		106	2008-10-07	335	4	4	16	15	8	8	0	0	1	1		100	93.8		563	1015	697
		107	2008-10-08	336	4	3	16	15	8	8	0	0	0	0		75	93.8		594	881	717
		108	2008-10-09	337	4	4	16	15	8	8	0	0	0	0		100	93.8		496	848	895
		109	2008-10-10	338	4	3	16	15	8	8	0	0	0	0		75	93.8		667	695	603
		110	2008-10-14	342	4	4	16	14	8	8	1	1	0	0		100	87.5		614	1038	944
		111	2008-10-15	343	4	4	16	16	8	8	0	0	0	0		100	100		488	741	703
		112	2008-10-16	344	4	4	16	15	8	8	0	0	0	0		100	93.8		648	967	760
		113	2008-10-17	345	4	4	16	15	8	8	0	0	0	0		100	93.8		637	835	1110
		114	2008-10-20	348	4	4	16	15	8	8	0	0	1	1		100	93.8		535	840	877
		115	2008-10-21	349	4	4	16	16	8	8	0	0	0	0		100	100		512	728	869
		116	2008-10-22	350	4	4	16	16	8	8	0	0	0	0		100	100		492	794	871
		117	2008-10-23	351	4	4	16	16	8	8	0	0	0	0		100	100		551	777	896
		118	2008-10-24	352	4	3	16	15	8	8	1	1	0	0		75	93.8		531	832	834
		119	2008-10-27	355	4	4	16	14	8	8	0	0	0	0		100	87.5		715	703	576
		120	2008-10-28	356	4	4	16	14	8	8	0	0	0	0		100	87.5		519	793	703
		121	2008-10-29	357	4	3	16	16	8	8	0	0	0	0		75	100		511	809	621
		122	2008-10-31	359	4	4	16	16	8	8	0	0	1	1		100	100		512	732	899
		123	2008-11-04	363	4	4	16	13	8	8	0	0	0	0		100	81.3		488	809	1016
		124	2008-11-05	364	4	3	16	13	8	8	0	0	0	0		75	81.3		610	810	975
		125	2008-11-06	365	4	4	16	15	8	8	0	0	0	0		100	93.8		629	709	957
		126	2008-11-07	366	4	4	16	15	8	8	1	1	0	0		100	93.8		625	785	1096
		127	2008-11-10	369	4	4	16	16	8	8	0	0	0	0		100	100		516	862	766
		128	2008-11-11	370	4	4	16	16	8	8	0	0	0	0		100	100		980	752	873
		129	2008-11-12	371	4	3	16	16	8	8	0	0	0	0		75	100		687	661	891
		130	2008-11-13	372	4	4	16	16	8	8	0	0	1	0		100	100		743	817	760
		131	2008-11-14	373	4	4	16	14	8	8	0	0	0	0		100	87.5		590	684	910
		132	2008-11-19	378	4	4	16	15	8	8	0	0	0	0		100	93.8		590	783	707
		133	2008-11-20	379	4	4	16	14	8	8	0	0	0	0		100	87.5		520	693	662
		134	2008-11-21	380	4	4	16	16	8	8	1	1	0	0		100	100		582	687	912
		135	2008-11-25	384	4	4	16	16	8	8	0	0	0	0		100	100		547	730	662
		136	2008-11-26	385	4	4	16	13	8	8	0	0	0	0		100	81.3		524	1138	664
		137	2008-11-27	386	4	4	16	16	8	8	0	0	0	0		100	100		481	783	976
		138	2008-11-28	387	4	4	16	13	8	8	0	0	1	1		100	81.3		508	761	881
		139	2008-12-01	390	4	4	16	15	8	8	0	0	0	0		100	93.8		617	716	871
		140	2008-12-04	393	4	4	16	15	8	8	0	0	0	0		100	93.8		426	928	762
		141	2008-12-08	397	4	4	16	14	8	8	0	0	0	0		100	87.5		418	914	717
		142	2008-12-09	398	4	4	16	15	8	8	1	1	0	0		100	93.8		496	630	666
		143	2008-12-10	399	4	4	16	11	8	8	0	0	0	0		100	68.8		535	1021	689
		144	2008-12-11	400	4	4	16	14	8	8	0	0	0	0		100	87.5		899	705	645
		145	2008-12-12	401	4	4	16	15	8	8	0	0	0	0		100	93.8		520	815	791
		146	2008-12-15	404	4	4	16	14	8	8	0	0	1	1		100	87.5		629	766	733
		147	2008-12-16	405	4	4	16	16	8	8	0	0	0	0		100	100		449	890	682
		148	2008-12-17	406	4	4	16	15	8	8	0	0	0	0		100	93.8		512	766	1209
		149	2008-12-18	407	4	3	16	15	8	8	0	0	0	0		75	93.8		479	843	855
		150	2008-12-22	411	4	4	16	16	8	8	1	1	0	0		100	100		676	1047	1045
		151	2008-12-24	413	4	4	16	15	8	8	0	0	0	0		100	93.8		563	950	778
		152	2008-12-25	414	4	4	16	16	8	8	0	0	0	0		100	100		512	700	885
		153	2008-12-26	415	4	4	16	15	8	8	0	0	0	0		100	93.8		547	870	840
		154	2009-01-05	425	4	4	16	16	8	8	0	0	1	1		100	100		422	994	885
		155	2009-01-06	426	4	4	16	14	8	8	0	0	0	0		100	87.5		473	737	709
		156	2009-01-07	427	4	4	16	15	8	8	0	0	0	0		100	93.8		527	844	1016
		157	2009-01-08	428	4	4	16	15	8	8	0	0	0	0		100	93.8		575	934	1082
		158	2009-01-09	429	4	3	16	16	8	8	1	0	0	0		75	100		568	852	991
		159	2009-01-19	439	4	4	16	14	8	8	0	0	0	0		100	87.5		606	916	903
		160	2009-01-23	443	4	3	16	16	8	8	0	0	0	0		75	100		448	723	879
		161	2009-01-27	447	4	3	16	15	8	8	0	0	0	0		75	93.8		521	671	725
		162	2009-01-28	448	4	4	16	14	8	8	0	0	1	0		100	87.5		504	837	736
		163	2009-01-29	449	4	4	16	16	8	8	0	0	0	0		100	100		699	751	781
		164	2009-01-30	450	4	4	16	14	8	8	0	0	0	0		100	87.5		450	723	899
		165	2009-02-02	453	4	4	16	13	8	8	0	0	0	0		100	81.3		484	870	811
		166	2009-02-03	454	4	3	16	14	8	8	1	1	0	0		75	87.5		510	881	768
		167	2009-02-04	455	4	4	16	15	8	8	0	0	0	0		100	93.8		586	814	1026
		168	2009-02-05	456	4	4	16	15	8	8	0	0	0	0		100	93.8		590	649	725
		169	2009-02-06	457	4	4	16	16	8	8	0	0	0	0		100	100		574	872	775
		170	2009-02-09	460	4	4	16	15	8	8	0	0	1	1		100	93.8		684	877	785
		171	2009-02-10	461	4	4	16	15	8	8	0	0	0	0		100	93.8		695	803	902
		172	2009-02-12	463	4	4	16	16	8	8	0	0	0	0		100	100		574	739	692
		173	2009-02-13	464	4	4	16	13	8	8	0	0	0	0		100	81.3		571	921	969
		174	2009-02-16	467	4	4	16	15	8	8	1	1	0	0		100	93.8		680	636	680
		175	2009-02-17	468	4	4	16	16	8	8	0	0	0	0		100	100		613	864	705
		176	2009-02-18	469	4	4	16	16	8	8	0	0	0	0		100	100		695	859	762
		177	2009-02-19	470	4	4	16	14	8	8	0	0	0	0		100	87.5		781	779	642
		178	2009-02-20	471	4	4	16	15	8	8	0	0	1	0		100	93.8		453	705	553
		179	2009-02-23	474	4	4	16	15	8	8	0	0	0	0		100	93.8		594	841	738
		180	2009-02-24	475	4	4	16	16	8	8	0	0	0	0		100	100		797	838	619
		181	2009-02-25	476	4	4	16	14	8	8	0	0	0	0		100	87.5		629	731	779
		182	2009-02-26	477	4	3	16	15	8	8	1	1	0	0		75	93.8		552	748	840
		183	2009-02-27	478	4	4	16	16	8	8	0	0	0	0		100	100		586	746	723
		184	2009-03-02	481	4	4	16	15	8	8	0	0	0	0		100	93.8		531	834	699
		185	2009-03-03	482	4	4	16	16	8	8	0	0	0	0		100	100		773	1019	764
		186	2009-03-04	483	4	3	16	15	8	8	0	0	1	1		75	93.8		485	749	789
		187	2009-03-05	484	4	4	16	14	8	8	0	0	0	0		100	87.5		575	780	725
		188	2009-03-06	485	4	3	16	16	8	8	0	0	0	0		75	100		588	651	941
		189	2009-03-09	488	4	4	16	16	8	8	0	0	0	0		100	100		473	781	729
		190	2009-03-10	489	4	4	16	14	8	8	1	1	0	0		100	87.5		558	831	815
		191	2009-03-11	490	4	2	16	15	8	8	0	0	0	0		50	93.8		601	816	957
		192	2009-03-12	491	4	4	16	13	8	8	0	0	0	0		100	81.3		567	890	944
		193	2009-03-13	492	4	4	16	16	8	8	0	0	0	0		100	100		504	705	822
		194	2009-03-17	496	4	4	16	15	8	8	0	0	1	1		100	93.8		825	945	778
		195	2009-04-27	537	4	3	16	14	8	8	0	0	0	0		75	87.5		541	732	748
		196	2009-04-28	538	4	4	16	14	8	8	0	0	0	0		100	87.5		489	752	977
		197	2009-04-30	540	4	4	16	15	8	8	0	0	0	0		100	93.8		559	860	734
		198	2009-05-01	541	4	4	16	15	8	8	1	1	0	0		100	93.8		524	906	898
		199	2009-05-07	547	4	4	16	16	8	8	0	0	0	0		100	100		500	730	676
		200	2009-05-08	548	4	3	16	15	8	8	0	0	0	0		75	93.8		630	777	842
		201	2009-05-11	551	4	4	16	15	8	8	0	0	0	0		100	93.8		621	1143	1113
		202	2009-05-12	552	4	4	16	16	8	8	0	0	1	1		100	100		547	680	856
		203	2009-05-13	553	4	4	16	16	8	8	0	0	0	0		100	100		551	770	1020
		204	2009-05-14	554	4	4	16	15	8	8	0	0	0	0		100	93.8		743	781	804
		205	2009-05-15	555	4	4	16	15	8	8	0	0	0	0		100	93.8		594	749	827
		206	2009-05-18	558	4	4	16	14	8	8	1	0	0	0		100	87.5		754	660	920
		207	2009-05-19	559	4	3	16	15	8	8	0	0	0	0		75	93.8		599	782	947
		208	2009-05-21	561	4	3	16	16	8	8	0	0	0	0		75	100		875	726	848
		209	2009-05-22	562	4	4	16	16	8	8	0	0	0	0		100	100		840	807	877
		210	2009-05-25	565	4	4	16	16	8	8	0	0	1	1		100	100		527	779	1240
		211	2009-05-26	566	4	4	16	15	8	8	0	0	0	0		100	93.8		449	937	703
		212	2009-05-27	567	4	4	16	15	8	8	0	0	0	0		100	93.8		836	806	955
		213	2009-05-28	568	4	4	16	16	8	8	0	0	0	0		100	100		649	859	760
		214	2009-05-29	569	4	4	16	15	8	8	1	1	0	0		100	93.8		656	664	838
		215	2009-06-01	572	4	4	16	15	8	8	0	0	0	0		100	93.8		453	989	986
		216	2009-06-04	575	4	4	16	15	8	8	0	0	0	0		100	93.8		492	661	743
		217	2009-06-05	576	4	4	16	15	8	8	0	0	0	0		100	93.8		496	985	760
		218	2009-06-08	579	4	4	16	15	8	8	0	0	1	0		100	93.8		523	854	721
		219	2009-06-09	580	4	4	16	15	8	8	0	0	0	0		100	93.8		785	824	1065
		220	2009-06-10	581	4	4	16	16	8	8	0	0	0	0		100	100		512	916	728
		221	2009-06-11	582	4	4	16	16	8	8	0	0	0	0		100	100		488	678	731
		222	2009-06-12	583	4	4	16	16	8	8	1	0	0	0		100	100		621	946	715
		223	2009-06-15	586	4	3	16	14	8	8	0	0	0	0		75	87.5		954	1071	752
		224	2009-06-16	587	4	4	16	15	8	8	0	0	0	0		100	93.8		981	675	883
		225	2009-06-17	588	4	4	16	16	8	8	0	0	0	0		100	100		632	996	801
		226	2009-06-19	590	4	4	16	16	8	8	0	0	0	0		100	100		641	635	799
		227	2009-06-22	593	4	4	16	16	8	8	0	0	1	1		100	100		544	1011	834
		228	2009-06-23	594	4	3	16	16	8	8	0	0	0	0		75	100		597	888	1045
		229	2009-06-24	595	4	4	16	16	8	8	0	0	0	0		100	100		444	701	787
		230	2009-06-25	596	4	4	16	15	8	8	0	0	0	0		100	93.8		918	979	736
		231	2009-06-26	597	4	4	16	15	8	8	0	0	0	0		100	93.8		603	663	598
		232	2009-06-29	600	4	3	16	15	8	8	1	1	0	0		75	93.8		476	774	794
		233	2009-06-30	601	4	4	16	16	8	8	0	0	0	0		100	100		489	725	835
		234	2009-07-01	602	4	4	16	16	8	8	0	0	0	0		100	100		541	712	894
		235	2009-07-02	603	4	4	16	15	8	8	0	0	0	0		100	93.8		723	735	820
		236	2009-07-03	604	4	4	16	16	8	8	0	0	1	0		100	100		723	704	728
		237	2009-07-06	607	4	3	16	14	8	8	0	0	0	0		75	87.5		901	819	727
		238	2009-07-07	608	4	4	16	16	8	8	0	0	0	0		100	100		515	827	781
		239	2009-07-08	609	4	4	16	16	8	8	0	0	0	0		100	100		610	722	988
		240	2009-07-10	611	4	4	16	16	8	8	1	1	0	0		100	100		627	783	757
		241	2009-07-13	614	4	4	16	16	8	8	0	0	0	0		100	100		664	732	658
		242	2009-07-14	615	4	4	16	14	8	8	0	0	0	0		100	87.5		604	820	762
		243	2009-07-15	616	4	4	16	16	8	8	0	0	0	0		100	100		635	743	625
		244	2009-07-16	617	4	4	16	15	8	8	0	0	1	1		100	93.8		431	893	830
		245	2009-07-17	618	4	4	16	14	8	8	0	0	0	0		100	87.5		605	710	899
		246	2009-07-21	622	4	4	16	15	8	8	0	0	0	0		100	93.8		549	719	667
		247	2009-07-23	624	4	4	16	16	8	8	0	0	0	0		100	100		519	687	723
		248	2009-07-24	625	4	3	16	14	8	8	1	1	0	0		75	87.5		772	782	832
		249	2009-07-27	628	4	4	16	13	8	8	0	0	0	0		100	81.3		605	744	857
		250	2009-07-28	629	4	4	16	16	8	8	0	0	0	0		100	100		512	858	918
		251	2009-07-29	630	4	4	16	14	8	8	0	0	0	0		100	87.5		628	706	760
		252	2009-08-06	638	4	4	16	14	8	8	0	0	1	0		100	87.5		676	760	916
		253	2009-08-10	642	4	4	16	13	8	8	0	0	0	0		100	81.3		603	1159	1009
		254	2009-08-11	643	4	3	16	15	8	8	0	0	0	0		75	93.8		590	1106	859
		255	2009-08-12	644	4	3	16	16	8	8	0	0	0	0		75	100		587	947	986
		256	2009-08-14	646	4	4	16	15	8	8	0	0	0	0		100	93.8		617	833	828
		257	2009-08-17	649	4	4	16	16	8	8	0	0	0	0		100	100		778	687	813
		258	2009-08-31	663	4	4	16	15	8	8	0	0	0	0		100	93.8		590	773	830
		259	2009-09-01	664	4	3	16	16	8	8	0	0	1	1		75	100		714	871	805
		Average										75		68.8		95.1	91.9		628	839	900

## Sheet: Ayumu Test
Ayumu
"What-did-you-choose?" Test
							Visual Search				What-did-you-choose Test					%Cor			Response Time (ms)
					MTS		homoDSTs		heteroDSTs		homoDSTs		heteroDSTs				Visual Search			Visual Search
		Session	Date	Days from 1st session	Total	Cor	Total	Cor	Total	Cor	Total	Cor	Total	Cor		MTS	homoDSTs		MTS	homoDSTs	heteroDSTs
		1	2007-11-02	0	nc		16	15	8	8	0	0	0	0			93.8			967	1324
		2	2007-11-07	5	nc		16	14	8	8	0	0	0	0			87.5			968	1430
		3	2007-11-08	6	4	4	16	16	8	8	0	0	0	0		100	100		578	721	1160
		4	2007-11-14	12	4	2	16	16	8	8	0	0	0	0		50	100		539	795	1399
		5	2007-11-15	13	4	4	16	16	8	8	1	1	0	0		100	100		742	745	897
		6	2007-11-26	24	4	4	16	16	8	8	0	0	0	0		100	100		774	749	1098
		7	2007-12-03	31	4	4	16	15	8	8	0	0	0	0		100	93.8		641	816	1002
		8	2007-12-05	33	4	3	16	16	8	8	0	0	0	0		75	100		469	870	1215
		9	2007-12-06	34	4	4	16	15	8	8	0	0	1	1		100	93.8		637	768	924
		10	2007-12-10	38	4	4	16	15	8	8	0	0	0	0		100	93.8		629	777	990
		11	2007-12-11	39	4	4	16	16	8	8	0	0	0	0		100	100		570	751	991
		12	2007-12-17	45	4	3	16	16	8	8	0	0	0	0		75	100		547	800	1375
		13	2007-12-19	47	4	4	16	16	8	8	1	1	0	0		100	100		551	900	1211
		14	2007-12-21	49	4	4	16	15	8	8	0	0	0	0		100	93.8		610	760	2037
		15	2007-12-25	53	4	4	16	15	8	8	0	0	0	0		100	93.8		629	1098	883
		16	2007-12-27	55	4	4	16	16	8	8	0	0	0	0		100	100		766	787	1504
		17	2008-01-07	66	4	4	16	14	8	8	0	0	1	1		100	87.5		914	928	881
		18	2008-01-15	74	4	3	16	15	8	8	0	0	0	0		75	93.8		531	672	818
		19	2008-01-18	77	4	4	16	16	8	8	0	0	0	0		100	100		602	781	1567
		20	2008-01-22	81	4	4	16	16	8	8	0	0	0	0		100	100		586	791	1492
		21	2008-01-23	82	4	4	16	16	8	8	1	1	0	0		100	100		602	811	1658
		22	2008-01-29	88	4	4	16	14	8	8	0	0	0	0		100	87.5		801	679	1219
		23	2008-01-30	89	4	4	16	16	8	8	0	0	0	0		100	100		746	787	1217
		24	2008-02-01	91	4	4	16	15	8	8	0	0	0	0		100	93.8		633	775	965
		25	2008-02-06	96	4	4	16	15	8	8	0	0	0	0		100	93.8		559	643	906
		26	2008-02-08	98	4	4	16	15	8	8	0	0	1	1		100	93.8		575	766	961
		27	2008-02-12	102	4	4	16	15	8	8	0	0	0	0		100	93.8		606	933	1377
		28	2008-02-15	105	4	4	16	16	8	8	0	0	0	0		100	100		649	757	1184
		29	2008-02-18	108	4	4	16	15	8	8	0	0	0	0		100	93.8		700	678	977
		30	2008-02-20	110	4	4	16	15	8	8	1	1	0	0		100	93.8		633	945	1340
		31	2008-02-21	111	4	4	16	16	8	8	0	0	0	0		100	100		493	676	1043
		32	2008-02-22	112	4	4	16	15	8	8	0	0	0	0		100	93.8		594	824	1832
		33	2008-02-25	115	4	3	16	16	8	8	0	0	0	0		75	100		729	741	1508
		34	2008-02-29	119	4	4	16	15	8	8	0	0	1	1		100	93.8		672	729	1977
		35	2008-03-03	122	4	4	16	16	8	8	0	0	0	0		100	100		578	1183	1883
		36	2008-03-07	126	4	4	16	16	8	8	0	0	0	0		100	100		527	898	1362
		37	2008-03-17	136	4	4	16	16	8	8	0	0	0	0		100	100		711	804	1387
		38	2008-04-01	151	4	4	16	16	8	8	1	1	0	0		100	100		621	754	1141
		39	2008-04-03	153	4	4	16	16	8	8	0	0	0	0		100	100		590	777	1432
		40	2008-04-04	154	4	4	16	16	8	8	0	0	0	0		100	100		641	1002	1256
		41	2008-04-07	157	4	4	16	16	8	8	0	0	0	0		100	100		766	1002	847
		42	2008-04-14	164	4	4	16	15	8	8	0	0	0	0		100	93.8		609	906	996
		43	2008-04-15	165	4	4	16	15	8	8	0	0	1	0		100	93.8		504	782	1553
		44	2008-04-16	166	4	4	16	16	8	8	0	0	0	0		100	100		485	879	2293
		45	2008-04-17	167	4	4	16	16	8	8	0	0	0	0		100	100		563	712	1053
		46	2008-04-18	168	4	3	16	16	8	8	0	0	0	0		75	100		495	815	1287
		47	2008-04-21	171	4	4	16	16	8	8	1	1	0	0		100	100		566	727	969
		48	2008-04-22	172	4	4	16	16	8	8	0	0	0	0		100	100		516	808	973
		49	2008-04-24	174	4	4	16	16	8	8	0	0	0	0		100	100		664	747	886
		50	2008-05-02	182	4	4	16	16	8	8	0	0	0	0		100	100		594	782	1315
		51	2008-05-09	189	4	4	16	15	8	8	0	0	1	1		100	93.8		516	892	1258
		52	2008-05-12	192	4	4	16	16	8	8	0	0	0	0		100	100		609	751	1342
		53	2008-05-19	199	4	4	16	15	8	8	0	0	0	0		100	93.8		633	771	1123
		54	2008-05-21	201	4	4	16	16	8	8	0	0	0	0		100	100		660	729	1674
		55	2008-05-22	202	4	4	16	16	8	8	0	0	0	0		100	100		520	703	1711
		56	2008-05-26	206	4	4	16	16	8	8	1	1	0	0		100	100		613	797	1205
		57	2008-05-27	207	4	4	16	14	8	8	0	0	0	0		100	87.5		524	757	1002
		58	2008-06-02	213	4	4	16	14	8	8	0	0	0	0		100	87.5		590	800	1440
		59	2008-06-03	214	4	3	16	16	8	8	0	0	0	0		75	100		500	678	1277
		60	2008-06-04	215	4	3	16	15	8	8	0	0	1	1		75	93.8		604	750	1166
		61	2008-06-05	216	4	4	16	16	8	8	0	0	0	0		100	100		894	684	1000
		62	2008-06-06	217	4	4	16	16	8	8	0	0	0	0		100	100		566	804	1088
		63	2008-06-09	220	4	4	16	16	8	8	0	0	0	0		100	100		500	761	1029
		64	2008-06-11	222	4	4	16	16	8	8	1	1	0	0		100	100		738	958	1660
		65	2008-06-13	224	4	4	16	15	8	8	0	0	0	0		100	93.8		750	891	1316
		66	2008-06-16	227	4	4	16	15	8	8	0	0	0	0		100	93.8		559	749	1106
		67	2008-06-17	228	4	4	16	16	8	8	0	0	0	0		100	100		547	763	1346
		68	2008-06-18	229	4	4	16	15	8	8	0	0	1	1		100	93.8		797	779	1080
		69	2008-06-19	230	4	4	16	16	8	8	0	0	0	0		100	100		485	717	1783
		70	2008-06-20	231	4	4	16	16	8	8	0	0	0	0		100	100		945	828	1336
		71	2008-06-23	234	4	4	16	16	8	8	0	0	0	0		100	100		590	785	1305
		72	2008-06-24	235	4	4	16	16	8	8	1	1	0	0		100	100		617	812	1748
		73	2008-06-25	236	4	4	16	16	8	8	0	0	0	0		100	100		446	718	1160
		74	2008-06-27	238	4	4	16	15	8	8	0	0	0	0		100	93.8		520	668	1398
		75	2008-06-30	241	4	4	16	15	8	8	0	0	1	1		100	93.8		602	761	1041
		76	2008-07-01	242	4	4	16	16	8	8	0	0	0	0		100	100		500	662	1043
		77	2008-07-02	243	4	4	16	15	8	8	0	0	0	0		100	93.8		531	773	1447
		78	2008-07-07	248	4	4	16	16	8	8	0	0	0	0		100	100		809	807	1072
		79	2008-07-08	249	4	4	16	16	8	8	1	1	0	0		100	100		555	722	1285
		80	2008-07-09	250	4	4	16	16	8	8	0	0	0	0		100	100		699	729	1487
		81	2008-07-10	251	4	4	16	16	8	8	0	0	0	0		100	100		528	779	1373
		82	2008-07-11	252	4	4	16	16	8	8	0	0	0	0		100	100		922	816	1322
		83	2008-07-14	255	4	4	16	16	8	8	0	0	1	1		100	100		477	815	1211
		84	2008-07-15	256	4	4	16	16	8	8	0	0	0	0		100	100		578	747	1184
		85	2008-07-16	257	4	4	16	16	8	8	0	0	0	0		100	100		824	1061	914
		86	2008-07-17	258	4	4	16	16	8	8	0	0	0	0		100	100		879	862	1145
		87	2008-07-24	265	4	4	16	16	8	8	1	1	0	0		100	100		773	711	1607
		88	2008-07-25	266	4	3	16	14	8	8	0	0	0	0		75	87.5		906	818	678
		89	2008-07-28	269	4	3	16	14	8	8	0	0	0	0		75	87.5		771	786	1012
		90	2008-07-29	270	4	4	16	16	8	8	0	0	0	0		100	100		1629	832	797
		91	2008-07-30	271	4	4	16	16	8	8	0	0	1	1		100	100		609	659	881
		92	2008-07-31	272	4	4	16	15	8	8	0	0	0	0		100	93.8		692	760	836
		93	2008-08-01	273	4	4	16	16	8	8	0	0	0	0		100	100		586	717	1090
		94	2008-08-11	283	4	3	16	15	8	8	0	0	0	0		75	93.8		1041	971	937
		95	2008-08-14	286	4	4	16	16	8	8	1	1	0	0		100	100		731	734	1203
		96	2008-08-15	287	4	4	16	16	8	8	0	0	0	0		100	100		696	700	826
		97	2008-08-18	290	4	4	16	15	8	8	0	0	0	0		100	93.8		617	750	1197
		98	2008-08-19	291	4	3	16	16	8	8	0	0	0	0		75	100		901	770	690
		99	2008-08-20	292	4	3	16	16	8	8	0	0	1	1		75	100		682	780	867
		100	2008-08-22	294	4	4	16	15	8	8	0	0	0	0		100	93.8		801	734	766
		101	2008-08-26	298	4	4	16	16	8	8	0	0	0	0		100	100		797	748	719
		102	2008-09-09	312	4	4	16	12	8	8	0	0	0	0		100	75		930	794	859
		103	2008-09-10	313	4	4	16	16	8	8	1	0	0	0		100	100		535	653	869
		104	2008-09-11	314	4	4	16	14	8	8	0	0	0	0		100	87.5		957	664	867
		105	2008-09-16	319	4	4	16	16	8	8	0	0	0	0		100	100		739	777	856
		106	2008-09-18	321	4	3	16	15	8	8	0	0	0	0		75	93.8		703	839	871
		107	2008-09-22	325	4	4	16	16	8	8	0	0	0	0		100	100		867	773	998
		108	2008-10-06	339	4	3	16	15	8	8	0	0	1	1		75	93.8		661	702	1281
		109	2008-10-17	350	4	4	16	16	8	8	0	0	0	0		100	100		695	1024	1231
		110	2008-10-20	353	4	4	16	15	8	8	0	0	0	0		100	93.8		582	683	990
		111	2008-10-21	354	4	4	16	15	8	8	0	0	0	0		100	93.8		520	647	1055
		112	2008-10-22	355	4	4	16	15	8	8	1	1	0	0		100	93.8		523	676	842
		113	2008-10-24	357	4	4	16	16	8	8	0	0	0	0		100	100		688	899	846
		114	2008-10-28	361	4	4	16	14	8	8	0	0	0	0		100	87.5		766	681	731
		115	2008-10-29	362	4	4	16	16	8	8	0	0	1	1		100	100		551	723	1026
		116	2008-10-31	364	4	4	16	16	8	8	0	0	0	0		100	100		696	752	959
		117	2008-11-04	368	4	4	16	15	8	8	0	0	0	0		100	93.8		558	880	1340
		118	2008-11-05	369	4	4	16	16	8	8	0	0	0	0		100	100		445	690	1129
		119	2008-11-07	371	4	3	16	16	8	8	1	0	0	0		75	100		541	730	930
		120	2008-11-10	374	4	4	16	15	8	8	0	0	0	0		100	93.8		582	760	932
		121	2008-11-11	375	4	4	16	16	8	8	0	0	0	0		100	100		543	649	828
		122	2008-11-12	376	4	4	16	16	8	8	0	0	1	0		100	100		395	586	715
		123	2008-11-13	377	4	4	16	16	8	8	0	0	0	0		100	100		598	711	731
		124	2008-11-14	378	4	4	16	15	8	8	0	0	0	0		100	93.8		641	841	1289
		125	2008-11-19	383	4	4	16	16	8	8	0	0	0	0		100	100		500	688	1205
		126	2008-11-20	384	4	4	16	16	8	8	0	0	0	0		100	100		594	673	1377
		127	2008-11-21	385	4	4	16	15	8	8	1	1	0	0		100	93.8		496	662	1365
		128	2008-11-25	389	4	4	16	16	8	8	0	0	0	0		100	100		426	720	949
		129	2008-11-26	390	4	4	16	15	8	8	0	0	0	0		100	93.8		504	632	1231
		130	2008-11-27	391	4	4	16	16	8	8	0	0	0	0		100	100		629	672	817
		131	2008-11-28	392	4	4	16	15	8	8	0	0	1	1		100	93.8		477	593	1094
		132	2008-12-01	395	4	4	16	16	8	8	0	0	0	0		100	100		547	925	1824
		133	2008-12-08	402	4	4	16	16	8	8	0	0	0	0		100	100		453	678	1506
		134	2008-12-09	403	4	3	16	16	8	8	0	0	0	0		75	100		604	675	1148
		135	2008-12-10	404	4	4	16	15	8	8	1	1	0	0		100	93.8		496	699	990
		136	2008-12-11	405	4	4	16	16	8	8	0	0	0	0		100	100		524	713	1226
		137	2008-12-12	406	4	4	16	15	8	8	0	0	0	0		100	93.8		473	702	916
		138	2008-12-15	409	4	4	16	16	8	8	0	0	0	0		100	100		473	707	1029
		139	2008-12-16	410	4	4	16	16	8	8	0	0	1	0		100	100		441	692	1088
		140	2008-12-17	411	4	4	16	16	8	8	0	0	0	0		100	100		723	727	852
		141	2008-12-18	412	4	4	16	15	8	8	0	0	0	0		100	93.8		449	605	699
		142	2008-12-22	416	4	4	16	15	8	8	0	0	0	0		100	93.8		606	776	1025
		143	2008-12-24	418	4	4	16	16	8	8	1	1	0	0		100	100		543	620	785
		144	2008-12-25	419	4	4	16	15	8	8	0	0	0	0		100	93.8		699	730	1094
		145	2008-12-26	420	4	3	16	16	8	8	0	0	0	0		75	100		703	776	851
		146	2009-01-05	430	4	4	16	13	8	8	0	0	0	0		100	81.3		590	713	1186
		147	2009-01-06	431	4	4	16	16	8	8	0	0	1	0		100	100		516	681	824
		148	2009-01-07	432	4	4	16	16	8	8	0	0	0	0		100	100		555	651	1219
		149	2009-01-09	434	4	4	16	15	8	8	0	0	0	0		100	93.8		558	744	1492
		150	2009-01-19	444	4	4	16	16	8	8	0	0	0	0		100	100		754	731	1022
		151	2009-01-20	445	4	4	16	16	8	8	1	1	0	0		100	100		531	813	936
		152	2009-01-23	448	4	4	16	16	8	8	0	0	0	0		100	100		512	1020	1149
		153	2009-01-27	452	4	4	16	16	8	8	0	0	0	0		100	100		571	638	1006
		154	2009-01-28	453	4	4	16	16	8	8	0	0	1	1		100	100		488	669	1096
		155	2009-01-29	454	4	4	16	16	8	8	0	0	0	0		100	100		535	606	1094
		156	2009-01-30	455	4	4	16	16	8	8	0	0	0	0		100	100		637	712	797
		157	2009-02-02	458	4	4	16	16	8	8	0	0	0	0		100	100		613	655	691
		158	2009-02-03	459	4	4	16	16	8	8	1	0	0	0		100	100		410	759	762
		159	2009-02-04	460	4	4	16	16	8	8	0	0	0	0		100	100		450	577	690
		160	2009-02-06	462	4	4	16	16	8	8	0	0	0	0		100	100		547	733	867
		161	2009-02-09	465	4	4	16	15	8	8	0	0	0	0		100	93.8		528	663	879
		162	2009-02-10	466	4	4	16	15	8	8	0	0	1	1		100	93.8		449	568	648
		163	2009-02-12	468	4	4	16	16	8	8	0	0	0	0		100	100		445	574	696
		164	2009-02-13	469	4	4	16	16	8	8	0	0	0	0		100	100		633	671	776
		165	2009-02-16	472	4	4	16	16	8	8	0	0	0	0		100	100		625	653	927
		166	2009-02-17	473	4	4	16	16	8	8	1	0	0	0		100	100		504	925	641
		167	2009-02-18	474	4	3	16	14	8	8	0	0	0	0		75	87.5		588	548	1045
		168	2009-02-19	475	4	4	16	16	8	8	0	0	0	0		100	100		543	600	633
		169	2009-02-20	476	4	4	16	16	8	8	0	0	0	0		100	100		492	578	854
		170	2009-02-23	479	4	4	16	16	8	8	0	0	1	1		100	100		504	689	705
		171	2009-02-24	480	4	4	16	16	8	8	0	0	0	0		100	100		633	585	658
		172	2009-02-25	481	4	4	16	16	8	8	0	0	0	0		100	100		473	640	897
		173	2009-02-26	482	4	4	16	16	8	8	0	0	0	0		100	100		465	700	963
		174	2009-02-27	483	4	4	16	16	8	8	1	1	0	0		100	100		488	1555	971
		175	2009-03-02	486	4	4	16	16	8	8	0	0	0	0		100	100		465	647	965
		176	2009-03-03	487	4	3	16	16	8	8	0	0	0	0		75	100		583	674	869
		177	2009-03-04	488	4	4	16	16	8	8	0	0	0	0		100	100		453	608	801
		178	2009-03-05	489	4	4	16	16	8	8	0	0	1	0		100	100		516	632	748
		179	2009-03-06	490	4	4	16	15	8	8	0	0	0	0		100	93.8		519	603	705
		180	2009-03-09	493	4	4	16	15	8	8	0	0	0	0		100	93.8		469	635	863
		181	2009-03-10	494	4	4	16	15	8	8	0	0	0	0		100	93.8		449	658	840
		182	2009-03-11	495	4	4	16	16	8	8	1	0	0	0		100	100		469	663	893
		183	2009-03-13	497	4	4	16	16	8	8	0	0	0	0		100	100		543	814	910
		184	2009-03-17	501	4	4	16	16	8	8	0	0	0	0		100	100		500	623	1231
		185	2009-03-19	503	4	3	16	16	8	8	0	0	0	0		75	100		443	607	914
		186	2009-03-27	511	4	4	16	15	8	8	0	0	1	1		100	93.8		418	619	793
		187	2009-03-30	514	4	4	16	16	8	8	0	0	0	0		100	100		461	713	695
		188	2009-03-31	515	4	4	16	16	8	8	0	0	0	0		100	100		465	713	943
		189	2009-04-01	516	4	4	16	16	8	8	0	0	0	0		100	100		501	581	867
		190	2009-04-02	517	4	4	16	16	8	8	1	0	0	0		100	100		453	635	941
		191	2009-04-03	518	4	4	16	15	8	8	0	0	0	0		100	93.8		430	650	789
		192	2009-04-06	521	4	4	16	15	8	8	0	0	0	0		100	93.8		488	664	885
		193	2009-04-07	522	4	4	16	15	8	8	0	0	0	0		100	93.8		618	611	873
		194	2009-04-08	523	4	4	16	15	8	8	0	0	1	1		100	93.8		551	612	928
		195	2009-04-10	525	4	4	16	16	8	8	0	0	0	0		100	100		492	675	720
		196	2009-04-13	528	4	4	16	16	8	8	0	0	0	0		100	100		594	642	744
		197	2009-04-14	529	4	4	16	16	8	8	0	0	0	0		100	100		442	571	764
		198	2009-04-15	530	4	4	16	15	8	8	1	1	0	0		100	93.8		703	597	730
		199	2009-04-16	531	4	4	16	15	8	8	0	0	0	0		100	93.8		391	648	770
		200	2009-04-17	532	4	4	16	16	8	8	0	0	0	0		100	100		473	632	789
		201	2009-04-20	535	4	4	16	16	8	8	0	0	0	0		100	100		582	596	711
		202	2009-04-22	537	4	4	16	16	8	8	0	0	1	1		100	100		496	691	797
		203	2009-04-23	538	4	4	16	16	8	8	0	0	0	0		100	100		449	617	621
		204	2009-04-24	539	4	4	16	16	8	8	0	0	0	0		100	100		453	711	824
		205	2009-04-27	542	4	4	16	16	8	8	0	0	0	0		100	100		485	683	734
		206	2009-04-28	543	4	4	16	16	8	8	1	1	0	0		100	100		426	589	672
		207	2009-04-30	545	4	4	16	16	8	8	0	0	0	0		100	100		453	615	686
		208	2009-05-01	546	4	3	16	16	8	8	0	0	0	0		75	100		740	570	754
		209	2009-05-08	553	4	4	16	15	8	8	0	0	0	0		100	93.8		449	651	844
		210	2009-05-11	556	4	4	16	15	8	8	0	0	1	1		100	93.8		418	602	699
		211	2009-05-12	557	4	4	16	14	8	8	0	0	0	0		100	87.5		555	638	836
		212	2009-05-13	558	4	4	16	16	8	8	0	0	0	0		100	100		559	701	816
		213	2009-05-14	559	4	4	16	16	8	8	0	0	0	0		100	100		508	637	748
		214	2009-05-15	560	4	4	16	16	8	8	1	1	0	0		100	100		438	740	680
		215	2009-05-18	563	4	4	16	16	8	8	0	0	0	0		100	100		472	638	762
		216	2009-05-20	565	4	4	16	16	8	8	0	0	0	0		100	100		531	626	709
		217	2009-05-21	566	4	4	16	16	8	8	0	0	0	0		100	100		543	709	910
		218	2009-05-22	567	4	4	16	16	8	8	0	0	1	1		100	100		930	566	728
		219	2009-05-25	570	4	4	16	16	8	8	0	0	0	0		100	100		559	627	623
		220	2009-05-26	571	4	4	16	16	8	8	0	0	0	0		100	100		781	700	666
		221	2009-05-27	572	4	4	16	16	8	8	0	0	0	0		100	100		500	2103	730
		222	2009-05-28	573	4	4	16	15	8	8	1	1	0	0		100	93.8		520	750	797
		223	2009-05-29	574	4	4	16	16	8	8	0	0	0	0		100	100		797	662	637
		224	2009-06-01	577	4	4	16	16	8	8	0	0	0	0		100	100		523	672	717
		225	2009-06-05	581	4	4	16	16	8	8	0	0	0	0		100	100		430	693	670
		226	2009-06-08	584	4	4	16	16	8	8	0	0	1	1		100	100		812	574	695
		227	2009-06-09	585	4	4	16	15	8	8	0	0	0	0		100	93.8		637	626	688
		228	2009-06-10	586	4	4	16	14	8	8	0	0	0	0		100	87.5		586	598	758
		229	2009-06-11	587	4	4	16	15	8	8	0	0	0	0		100	93.8		597	559	732
		230	2009-06-12	588	4	4	16	15	8	8	1	1	0	0		100	93.8		711	705	740
		231	2009-06-15	591	4	4	16	16	8	8	0	0	0	0		100	100		637	643	727
		232	2009-06-16	592	4	4	16	16	8	8	0	0	0	0		100	100		500	594	670
		233	2009-06-17	593	4	4	16	16	8	8	0	0	0	0		100	100		492	636	660
		234	2009-06-19	595	4	4	16	16	8	8	0	0	1	0		100	100		457	603	701
		235	2009-06-22	598	4	4	16	16	8	8	0	0	0	0		100	100		614	634	582
		236	2009-06-23	599	4	4	16	16	8	8	0	0	0	0		100	100		570	678	803
		237	2009-06-25	601	4	4	16	15	8	8	0	0	0	0		100	93.8		508	645	816
		238	2009-06-29	605	4	4	16	16	8	8	1	1	0	0		100	100		410	754	895
		239	2009-06-30	606	4	4	16	15	8	8	0	0	0	0		100	93.8		590	669	813
		240	2009-07-01	607	4	4	16	16	8	8	0	0	0	0		100	100		500	614	738
		241	2009-07-02	608	4	4	16	15	8	8	0	0	0	0		100	93.8		449	599	881
		242	2009-07-03	609	4	4	16	16	8	8	0	0	1	0		100	100		785	730	817
		243	2009-07-06	612	4	4	16	16	8	8	0	0	0	0		100	100		512	906	953
		244	2009-07-07	613	4	4	16	15	8	8	0	0	0	0		100	93.8		657	587	654
		245	2009-07-08	614	4	4	16	16	8	8	0	0	0	0		100	100		473	664	674
		246	2009-07-10	616	4	3	16	16	8	8	1	1	0	0		75	100		834	760	1078
		247	2009-07-13	619	4	3	16	16	8	8	0	0	0	0		75	100		610	685	875
		248	2009-07-14	620	4	4	16	15	8	8	0	0	0	0		100	93.8		660	731	818
		249	2009-07-15	621	4	4	16	16	8	8	0	0	0	0		100	100		445	804	1004
		250	2009-07-17	623	4	4	16	16	8	8	0	0	1	1		100	100		457	798	806
		251	2009-07-21	627	4	4	16	16	8	8	0	0	0	0		100	100		555	611	811
		252	2009-07-22	628	4	4	16	16	8	8	0	0	0	0		100	100		609	825	1340
		253	2009-07-23	629	4	4	16	15	8	8	0	0	0	0		100	93.8		1648	670	1211
		254	2009-07-24	630	4	4	16	16	8	8	1	0	0	0		100	100		907	742	1002
		255	2009-07-27	633	4	4	16	16	8	8	0	0	0	0		100	100		528	716	984
		256	2009-07-28	634	4	4	16	16	8	8	0	0	0	0		100	100		695	717	889
		257	2009-07-29	635	4	4	16	16	8	8	0	0	0	0		100	100		711	691	795
		258	2009-08-10	647	4	4	16	16	8	8	0	0	1	1		100	100		977	727	619
		Average										78.1		78.1		97.5	97.6		601	734	1013

## Sheet: Cleo Test
Cleo
"What-did-you-choose?" Test
							Visual Search				What-did-you-choose Test					%Cor			Response Time (ms)
					MTS		homoDSTs		heteroDSTs		homoDSTs		heteroDSTs				Visual Search			Visual Search
		Session	Date	Days from 1st session	Total	Cor	Total	Cor	Total	Cor	Total	Cor	Total	Cor		MTS	homoDSTs		MTS	homoDSTs	heteroDSTs
		1	2007-11-05	0	nc		16	13	8	8	0	0	0	0			81.3		0	1265	1203
		2	2007-11-06	1	nc		16	10	8	8	0	0	0	0			62.5		0	897	662
		3	2007-11-07	2	nc		16	12	8	8	0	0	0	0			75		0	827	750
		4	2007-11-08	3	4	4	16	14	8	8	1	0	0	0		100	87.5		805	883	1166
		5	2007-11-09	4	4	4	16	13	8	8	0	0	0	0		100	81.3		617	880	1240
		6	2007-11-13	8	4	3	16	16	8	8	0	0	0	0		75	100		1073	1149	1285
		7	2007-11-14	9	4	4	16	14	8	8	0	0	0	0		100	87.5		707	942	1191
		8	2007-11-15	10	4	4	16	15	8	8	0	0	0	0		100	93.8		567	889	1283
		9	2007-11-16	11	4	4	16	14	8	8	0	0	1	1		100	87.5		691	720	852
		10	2007-11-20	15	4	4	16	12	8	8	0	0	0	0		100	75		1395	772	604
		11	2007-11-22	17	4	4	16	13	8	8	0	0	0	0		100	81.3		774	746	778
		12	2007-11-24	19	4	4	16	10	8	8	0	0	0	0		100	62.5		723	674	773
		13	2007-11-26	21	4	4	16	11	8	8	1	0	0	0		100	68.8		1223	935	729
		14	2007-11-27	22	4	3	16	10	8	8	0	0	0	0		75	62.5		661	794	705
		15	2007-11-27	22	4	4	16	6	8	8	0	0	0	0		100	37.5		672	714	1096
		16	2007-11-28	23	4	4	16	14	8	8	0	0	0	0		100	87.5		805	696	1026
		17	2007-11-29	24	4	4	16	12	8	8	0	0	1	1		100	75		570	777	813
		18	2007-12-03	28	4	4	16	14	8	8	0	0	0	0		100	87.5		906	1060	758
		19	2007-12-04	29	4	3	16	11	8	8	0	0	0	0		75	68.8		822	872	869
		20	2007-12-05	30	4	4	16	13	8	8	0	0	0	0		100	81.3		656	838	875
		21	2007-12-05	30	4	4	16	10	8	8	0	0	0	0		100	62.5		965	809	879
		22	2007-12-06	31	4	3	16	13	8	8	0	0	0	0		75	81.3		1453	838	738
		23	2007-12-10	35	4	4	16	14	8	8	1	1	0	0		100	87.5		719	1016	824
		24	2007-12-11	36	4	4	16	14	8	8	0	0	0	0		100	87.5		695	926	1063
		25	2007-12-13	38	4	4	16	14	8	8	0	0	0	0		100	87.5		594	903	1309
		26	2007-12-13	38	4	4	16	14	8	8	0	0	0	0		100	87.5		633	1000	1307
		27	2007-12-14	39	4	4	16	14	8	8	0	0	0	0		100	87.5		617	815	992
		28	2007-12-14	39	4	4	16	16	8	8	0	0	1	1		100	100		1207	1000	811
		29	2007-12-17	42	4	3	16	14	8	8	0	0	1	1		75	87.5		1802	857	1006
		30	2007-12-19	44	4	4	16	15	8	8	0	0	0	0		100	93.8		813	934	1115
		31	2007-12-21	46	4	4	16	16	8	8	0	0	0	0		100	100		875	1366	1367
		32	2007-12-22	47	4	4	16	16	8	8	0	0	0	0		100	100		941	834	1010
		33	2007-12-25	50	4	4	16	10	8	8	0	0	0	0		100	62.5		707	950	930
		34	2007-12-27	52	4	4	16	15	8	8	1	0	0	0		100	93.8		657	909	1004
		35	2008-01-07	63	4	4	16	13	8	8	0	0	0	0		100	81.3		891	791	1006
		36	2008-01-08	64	4	3	16	14	8	8	0	0	0	0		75	87.5		1140	1027	1422
		37	2008-01-10	66	4	4	16	16	8	8	0	0	0	0		100	100		582	930	1016
		38	2008-01-15	71	4	4	16	10	8	8	0	0	1	1		100	62.5		1148	839	762
		39	2008-01-18	74	4	4	16	11	8	8	0	0	0	0		100	68.8		942	905	795
		40	2008-01-19	75	4	4	16	14	8	8	0	0	0	0		100	87.5		825	854	889
		41	2008-01-22	78	4	4	16	10	8	8	0	0	0	0		100	62.5		879	648	643
		42	2008-01-23	79	4	4	16	13	8	8	1	1	0	0		100	81.3		1043	885	641
		43	2008-01-26	82	4	4	16	12	8	8	0	0	0	0		100	75		1063	931	1008
		44	2008-01-29	85	4	4	16	12	8	8	0	0	0	0		100	75		1223	934	885
		45	2008-01-31	87	4	4	16	14	8	8	0	0	0	0		100	87.5		645	932	998
		46	2008-02-01	88	4	4	16	15	8	8	0	0	1	1		100	93.8		590	903	846
		47	2008-02-06	93	4	4	16	11	8	8	0	0	0	0		100	68.8		793	1105	963
		48	2008-02-07	94	4	4	16	14	8	8	0	0	0	0		100	87.5		629	904	588
		49	2008-02-12	99	4	4	16	14	8	8	0	0	0	0		100	87.5		735	1061	1055
		50	2008-02-15	102	4	4	16	15	8	8	1	0	0	0		100	93.8		692	1228	1156
		51	2008-02-16	103	4	4	16	15	8	8	0	0	0	0		100	93.8		563	624	527
		52	2008-02-18	105	4	3	16	16	8	8	0	0	0	0		75	100		536	836	848
		53	2008-02-20	107	4	4	16	13	8	8	0	0	0	0		100	81.3		727	960	986
		54	2008-02-21	108	4	4	16	14	8	8	0	0	1	1		100	87.5		594	1145	1096
		55	2008-02-22	109	4	4	16	16	8	8	0	0	0	0		100	100		531	863	793
		56	2008-02-23	110	4	4	16	15	8	8	0	0	0	0		100	93.8		687	778	1363
		57	2008-02-25	112	4	4	16	16	8	8	0	0	0	0		100	100		695	1620	1215
		58	2008-02-26	113	4	4	16	14	8	8	1	1	0	0		100	87.5		610	793	873
		59	2008-02-29	116	4	4	16	16	8	8	0	0	0	0		100	100		703	1424	932
		60	2008-03-01	117	4	4	16	15	8	8	0	0	0	0		100	93.8		574	781	1137
		61	2008-03-03	119	4	4	16	16	8	8	0	0	0	0		100	100		746	775	879
		62	2008-03-04	120	4	4	16	15	8	8	0	0	1	1		100	93.8		754	756	918
		63	2008-03-06	122	4	4	16	16	8	8	0	0	0	0		100	100		777	913	744
		64	2008-03-07	123	4	4	16	16	8	8	0	0	0	0		100	100		574	855	1020
		65	2008-03-10	126	4	4	16	16	8	8	0	0	0	0		100	100		981	1032	1244
		66	2008-03-13	129	4	4	16	15	8	8	1	1	0	0		100	93.8		629	1006	1352
		67	2008-03-15	131	4	3	16	15	8	8	0	0	0	0		75	93.8		782	943	955
		68	2008-03-17	133	4	4	16	15	8	8	0	0	0	0		100	93.8		680	943	912
		69	2008-03-24	140	4	4	16	15	8	8	0	0	0	0		100	93.8		1324	1117	891
		70	2008-04-01	148	4	4	16	15	8	8	0	0	1	1		100	93.8		512	962	899
		71	2008-04-03	150	4	4	16	14	8	8	0	0	0	0		100	87.5		574	971	1731
		72	2008-04-05	152	4	3	16	16	8	8	0	0	0	0		75	100		614	1118	1049
		73	2008-04-07	154	4	4	16	14	8	8	0	0	0	0		100	87.5		656	872	852
		74	2008-04-10	157	4	4	16	14	8	8	1	1	0	0		100	87.5		1059	1256	910
		75	2008-04-11	158	4	4	16	16	8	8	0	0	0	0		100	100		1028	989	865
		76	2008-04-14	161	4	4	16	13	8	8	0	0	0	0		100	81.3		1113	1238	981
		77	2008-04-15	162	4	4	16	16	8	8	0	0	0	0		100	100		758	981	1184
		78	2008-04-16	163	4	4	16	13	8	8	1	1	0	0		100	81.3		746	804	721
		79	2008-04-17	164	4	4	16	16	8	8	0	0	0	0		100	100		1000	724	996
		80	2008-04-18	165	4	3	16	16	8	8	0	0	0	0		75	100		469	803	1002
		81	2008-04-19	166	4	4	16	16	8	8	0	0	0	0		100	100		1195	949	926
		82	2008-04-22	169	4	4	16	16	8	8	0	0	1	1		100	100		738	997	1221
		83	2008-04-24	171	4	4	16	15	8	8	0	0	0	0		100	93.8		664	1192	1049
		84	2008-04-26	173	4	4	16	13	8	8	0	0	0	0		100	81.3		739	767	707
		85	2008-04-28	175	4	4	16	16	8	8	1	1	0	0		100	100		1227	1051	1276
		86	2008-05-01	178	4	4	16	15	8	8	0	0	0	0		100	93.8		2832	1075	834
		87	2008-05-02	179	4	3	16	15	8	8	0	0	0	0		75	93.8		781	910	692
		88	2008-05-08	185	4	4	16	15	8	8	0	0	0	0		100	93.8		1012	1228	1400
		89	2008-05-08	185	4	4	16	14	8	8	0	0	0	0		100	87.5		750	849	1553
		90	2008-05-10	187	4	4	16	15	8	8	0	0	1	1		100	93.8		629	815	910
		91	2008-05-12	189	4	4	16	14	8	8	0	0	0	0		100	87.5		750	1034	1072
		92	2008-05-15	192	4	4	16	14	8	8	0	0	0	0		100	87.5		946	867	928
		93	2008-05-16	193	4	4	16	16	8	8	0	0	0	0		100	100		617	971	1057
		94	2008-05-17	194	4	4	16	15	8	8	1	0	0	0		100	93.8		586	703	695
		95	2008-05-19	196	4	4	16	15	8	8	0	0	0	0		100	93.8		652	856	787
		96	2008-05-21	198	4	3	16	12	8	8	0	0	0	0		75	75		745	941	1051
		97	2008-05-26	203	4	4	16	16	8	8	0	0	0	0		100	100		660	1098	1051
		98	2008-05-27	204	4	4	16	15	8	8	0	0	1	1		100	93.8		566	669	838
		99	2008-06-02	210	4	4	16	16	8	8	0	0	0	0		100	100		629	986	969
		100	2008-06-03	211	4	4	16	13	8	8	0	0	0	0		100	81.3		621	977	838
		101	2008-06-04	212	4	4	16	14	8	8	0	0	0	0		100	87.5		708	776	787
		102	2008-06-05	213	4	4	16	15	8	8	1	1	0	0		100	93.8		695	815	1115
		103	2008-06-06	214	4	4	16	15	8	8	0	0	0	0		100	93.8		578	848	758
		104	2008-06-09	217	4	4	16	16	8	8	0	0	0	0		100	100		558	838	1053
		105	2008-06-10	218	4	4	16	16	8	8	0	0	0	0		100	100		582	950	828
		106	2008-06-11	219	4	4	16	15	8	8	0	0	1	1		100	93.8		477	827	828
		107	2008-06-12	220	4	4	16	14	8	8	0	0	0	0		100	87.5		547	856	840
		108	2008-06-13	221	4	4	16	16	8	8	0	0	0	0		100	100		578	837	953
		109	2008-06-14	222	4	4	16	14	8	8	0	0	0	0		100	87.5		766	1027	877
		110	2008-06-16	224	4	4	16	15	8	8	1	1	0	0		100	93.8		821	906	1021
		111	2008-06-17	225	4	4	16	15	8	8	0	0	0	0		100	93.8		949	728	940
		112	2008-06-18	226	4	4	16	16	8	8	0	0	0	0		100	100		836	849	838
		113	2008-06-20	228	4	4	16	15	8	8	0	0	0	0		100	93.8		582	800	965
		114	2008-06-23	231	4	4	16	15	8	8	0	0	1	1		100	93.8		762	913	871
		115	2008-06-24	232	4	4	16	15	8	8	0	0	0	0		100	93.8		922	983	990
		116	2008-06-25	233	4	4	16	15	8	8	0	0	0	0		100	93.8		781	822	912
		117	2008-06-26	234	4	4	16	16	8	8	0	0	0	0		100	100		867	968	914
		118	2008-06-27	235	4	4	16	14	8	8	1	1	0	0		100	87.5		547	967	1224
		119	2008-06-28	236	4	4	16	15	8	8	0	0	0	0		100	93.8		601	878	1346
		120	2008-06-30	238	4	4	16	16	8	8	0	0	0	0		100	100		535	700	947
		121	2008-07-01	239	4	4	16	16	8	8	0	0	0	0		100	100		637	813	762
		122	2008-07-02	240	4	3	16	16	8	8	0	0	1	1		75	100		636	897	703
		123	2008-07-03	241	4	4	16	15	8	8	0	0	0	0		100	93.8		1094	918	768
		124	2008-07-07	245	4	4	16	15	8	8	0	0	0	0		100	93.8		883	710	725
		125	2008-07-08	246	4	4	16	14	8	8	0	0	0	0		100	87.5		684	844	697
		126	2008-07-09	247	4	4	16	16	8	8	1	1	0	0		100	100		801	840	662
		127	2008-07-10	248	4	4	16	15	8	8	0	0	0	0		100	93.8		664	798	744
		128	2008-07-11	249	4	4	16	16	8	8	0	0	0	0		100	100		746	749	846
		129	2008-07-14	252	4	4	16	14	8	8	0	0	0	0		100	87.5		953	982	988
		130	2008-07-15	253	4	4	16	15	8	8	0	0	1	1		100	93.8		614	1178	1008
		131	2008-07-16	254	4	3	16	16	8	8	0	0	0	0		75	100		625	837	787
		132	2008-07-17	255	4	3	16	16	8	8	0	0	0	0		75	100		755	839	1004
		133	2008-07-24	262	4	4	16	16	8	8	0	0	0	0		100	100		641	913	828
		134	2008-07-25	263	4	4	16	14	8	8	1	1	0	0		100	87.5		719	933	768
		135	2008-07-26	264	4	4	16	15	8	8	0	0	0	0		100	93.8		723	836	797
		136	2008-07-28	266	4	4	16	15	8	8	0	0	0	0		100	93.8		684	860	594
		137	2008-07-29	267	4	4	16	15	8	8	0	0	0	0		100	93.8		543	696	1024
		138	2008-07-30	268	4	4	16	15	8	8	0	0	1	1		100	93.8		641	876	705
		139	2008-07-31	269	4	4	16	16	8	8	0	0	0	0		100	100		957	786	691
		140	2008-08-01	270	4	4	16	15	8	8	0	0	0	0		100	93.8		562	693	941
		141	2008-08-11	280	4	4	16	14	8	8	0	0	0	0		100	87.5		957	902	1125
		142	2008-08-12	281	4	4	16	14	8	8	1	1	0	0		100	87.5		895	818	892
		143	2008-08-13	282	4	4	16	15	8	8	0	0	0	0		100	93.8		567	793	930
		144	2008-08-14	283	4	3	16	15	8	8	0	0	0	0		75	93.8		453	647	736
		145	2008-08-16	285	4	3	16	15	8	8	0	0	0	0		75	93.8		1042	808	739
		146	2008-08-18	287	4	3	16	15	8	8	0	0	1	1		75	93.8		588	781	992
		147	2008-08-19	288	4	4	16	15	8	8	0	0	0	0		100	93.8		602	872	1033
		148	2008-08-20	289	4	4	16	14	8	8	0	0	0	0		100	87.5		668	753	676
		149	2008-08-22	291	4	4	16	10	8	8	0	0	0	0		100	62.5		731	1288	815
		150	2008-08-23	292	4	4	16	13	8	8	1	1	0	0		100	81.3		653	944	1014
		151	2008-08-26	295	4	4	16	15	8	8	0	0	0	0		100	93.8		820	1028	969
		152	2008-08-27	296	4	4	16	15	8	8	0	0	0	0		100	93.8		453	834	744
		153	2008-09-06	306	4	4	16	13	8	8	0	0	0	0		100	81.3		554	967	699
		154	2008-09-08	308	4	4	16	16	8	8	0	0	1	1		100	100		598	807	830
		155	2008-09-09	309	4	3	16	14	8	8	0	0	0	0		75	87.5		672	807	984
		156	2008-09-10	310	4	4	16	16	8	8	0	0	0	0		100	100		660	749	738
		157	2008-09-11	311	4	3	16	15	8	8	0	0	0	0		75	93.8		468	835	1065
		158	2008-09-16	316	4	4	16	16	8	8	1	0	0	0		100	100		793	704	1002
		159	2008-09-17	317	4	4	16	16	8	8	0	0	0	0		100	100		484	644	657
		160	2008-09-19	319	4	4	16	12	8	8	0	0	0	0		100	75		719	918	742
		161	2008-09-27	327	4	4	16	14	8	8	0	0	0	0		100	87.5		629	743	795
		162	2008-10-01	331	4	3	16	14	8	8	0	0	1	1		75	87.5		1016	1257	1155
		163	2008-10-02	332	4	4	16	15	8	8	0	0	0	0		100	93.8		555	759	668
		164	2008-10-04	334	4	4	16	14	8	8	0	0	0	0		100	87.5		574	922	895
		165	2008-10-06	336	4	4	16	15	8	8	0	0	0	0		100	93.8		644	786	959
		166	2008-10-07	337	4	4	16	16	8	8	1	1	0	0		100	100		907	777	934
		167	2008-10-08	338	4	4	16	15	8	8	0	0	0	0		100	93.8		1610	1118	842
		168	2008-10-09	339	4	4	16	16	8	8	0	0	0	0		100	100		586	828	891
		169	2008-10-10	340	4	4	16	16	8	8	0	0	0	0		100	100		555	1109	918
		170	2008-10-11	341	4	4	16	16	8	8	0	0	1	0		100	100		602	777	758
		171	2008-10-14	344	4	4	16	16	8	8	0	0	0	0		100	100		613	770	619
		172	2008-10-15	345	4	4	16	14	8	8	0	0	0	0		100	87.5		562	700	1154
		173	2008-10-16	346	4	4	16	16	8	8	0	0	0	0		100	100		660	701	857
		174	2008-10-17	347	4	4	16	15	8	8	1	1	0	0		100	93.8		762	844	914
		175	2008-10-18	348	4	4	16	16	8	8	0	0	0	0		100	100		676	820	865
		176	2008-10-20	350	4	4	16	15	8	8	0	0	0	0		100	93.8		899	829	1076
		177	2008-10-22	352	4	4	16	14	8	8	0	0	0	0		100	87.5		598	897	1262
		178	2008-10-23	353	4	4	16	14	8	8	0	0	1	1		100	87.5		582	872	830
		179	2008-10-24	354	4	4	16	15	8	8	0	0	0	0		100	93.8		590	894	1022
		180	2008-10-25	355	4	4	16	16	8	8	0	0	0	0		100	100		597	1016	871
		181	2008-10-27	357	4	4	16	16	8	8	0	0	0	0		100	100		719	753	910
		182	2008-10-30	360	4	4	16	16	8	8	1	1	0	0		100	100		610	885	986
		183	2008-10-31	361	4	4	16	16	8	8	0	0	0	0		100	100		520	761	1684
		184	2008-11-01	362	4	4	16	16	8	8	0	0	0	0		100	100		574	841	1088
		185	2008-11-04	365	4	3	16	16	8	8	0	0	0	0		75	100		479	914	1293
		186	2008-11-05	366	4	4	16	16	8	8	0	0	1	1		100	100		614	828	1088
		187	2008-11-06	367	4	4	16	16	8	8	0	0	0	0		100	100		500	807	764
		188	2008-11-07	368	4	4	16	15	8	8	0	0	0	0		100	93.8		555	790	742
		189	2008-11-08	369	4	4	16	15	8	8	0	0	0	0		100	93.8		586	707	766
		190	2008-11-10	371	4	4	16	15	8	8	1	1	0	0		100	93.8		527	846	604
		191	2008-11-11	372	4	4	16	13	8	8	0	0	0	0		100	81.3		473	920	658
		192	2008-11-12	373	4	4	16	16	8	8	0	0	0	0		100	100		535	724	836
		193	2008-11-13	374	4	4	16	16	8	8	0	0	0	0		100	100		594	806	1297
		194	2008-11-14	375	4	4	16	16	8	8	0	0	1	1		100	100		621	795	662
		195	2008-11-19	380	4	4	16	16	8	8	0	0	0	0		100	100		781	855	1121
		196	2008-11-20	381	4	4	16	16	8	8	0	0	0	0		100	100		601	1228	1063
		197	2008-11-21	382	4	4	16	16	8	8	0	0	0	0		100	100		871	992	1455
		198	2008-11-22	383	4	4	16	15	8	8	1	1	0	0		100	93.8		746	890	846
		199	2008-11-25	386	4	4	16	16	8	8	0	0	0	0		100	100		578	1007	1201
		200	2008-11-26	387	4	4	16	16	8	8	0	0	0	0		100	100		547	1009	1135
		201	2008-11-27	388	4	4	16	14	8	8	0	0	0	0		100	87.5		809	708	850
		202	2008-11-28	389	4	4	16	16	8	8	0	0	1	1		100	100		668	740	725
		203	2008-11-29	390	4	4	16	16	8	8	0	0	0	0		100	100		594	977	1439
		204	2008-12-01	392	4	4	16	15	8	8	0	0	0	0		100	93.8		582	953	1006
		205	2008-12-02	393	4	4	16	16	8	8	0	0	0	0		100	100		524	827	936
		206	2008-12-04	395	4	4	16	16	8	8	0	0	0	0		100	100		781	782	707
		207	2008-12-06	397	4	4	16	15	8	8	1	1	0	0		100	93.8		598	968	1045
		208	2008-12-08	399	4	4	16	16	8	8	0	0	0	0		100	100		598	685	963
		209	2008-12-09	400	4	4	16	16	8	8	0	0	0	0		100	100		524	924	967
		210	2008-12-10	401	4	4	16	16	8	8	0	0	0	0		100	100		512	886	836
		211	2008-12-11	402	4	4	16	16	8	8	0	0	1	1		100	100		711	1062	920
		212	2008-12-12	403	4	4	16	14	8	8	0	0	0	0		100	87.5		598	730	928
		213	2008-12-13	404	4	4	16	16	8	8	0	0	0	0		100	100		508	903	924
		214	2008-12-15	406	4	3	16	16	8	8	0	0	0	0		75	100		578	872	1039
		215	2008-12-17	408	4	4	16	16	8	8	0	0	0	0		100	100		664	1102	930
		216	2008-12-18	409	4	4	16	16	8	8	1	1	0	0		100	100		504	800	1008
		217	2008-12-19	410	4	4	16	15	8	8	0	0	0	0		100	93.8		836	991	779
		218	2008-12-22	413	4	4	16	16	8	8	0	0	0	0		100	100		461	821	584
		219	2008-12-24	415	4	4	16	16	8	8	0	0	0	0		100	100		840	1054	775
		220	2008-12-25	416	4	4	16	16	8	8	0	0	1	1		100	100		563	1012	813
		221	2008-12-26	417	4	4	16	16	8	8	0	0	0	0		100	100		793	746	785
		222	2008-12-27	418	4	4	16	13	8	8	0	0	0	0		100	81.3		656	869	947
		223	2009-01-05	427	4	4	16	16	8	8	0	0	0	0		100	100		547	939	875
		224	2009-01-06	428	4	3	16	15	8	8	1	0	0	0		75	93.8		776	809	895
		225	2009-01-07	429	4	4	16	16	8	8	0	0	0	0		100	100		703	721	660
		226	2009-01-08	430	4	4	16	15	8	8	0	0	0	0		100	93.8		648	576	818
		227	2009-01-09	431	4	4	16	15	8	8	0	0	0	0		100	93.8		508	693	754
		228	2009-01-10	432	4	4	16	16	8	8	0	0	1	1		100	100		777	664	783
		229	2009-01-19	441	4	4	16	15	8	8	0	0	0	0		100	93.8		602	752	871
		230	2009-01-20	442	4	4	16	16	8	8	0	0	0	0		100	100		512	785	711
		231	2009-01-23	445	4	4	16	16	8	8	0	0	0	0		100	100		696	852	619
		232	2009-01-24	446	4	4	16	15	8	8	1	1	0	0		100	93.8		504	891	813
		233	2009-01-27	449	4	4	16	15	8	8	0	0	0	0		100	93.8		493	1022	1053
		234	2009-01-28	450	4	4	16	15	8	8	0	0	0	0		100	93.8		738	684	703
		235	2009-01-29	451	4	4	16	15	8	8	0	0	0	0		100	93.8		672	904	844
		236	2009-01-30	452	4	4	16	14	8	8	0	0	1	1		100	87.5		1289	1076	1428
		237	2009-01-31	453	4	4	16	16	8	8	0	0	0	0		100	100		551	711	861
		238	2009-02-02	455	4	4	16	14	8	8	0	0	0	0		100	87.5		742	825	959
		239	2009-02-03	456	4	4	16	16	8	8	0	0	0	0		100	100		508	813	1121
		240	2009-02-04	457	4	4	16	15	8	8	1	1	0	0		100	93.8		536	764	719
		241	2009-02-05	458	4	4	16	14	8	8	0	0	0	0		100	87.5		2051	696	711
		242	2009-02-06	459	4	4	16	16	8	8	0	0	0	0		100	100		766	774	990
		243	2009-02-07	460	4	4	16	16	8	8	0	0	0	0		100	100		484	858	1086
		244	2009-02-09	462	4	4	16	16	8	8	0	0	1	1		100	100		859	701	896
		245	2009-02-10	463	4	3	16	15	8	8	0	0	0	0		75	93.8		568	1091	998
		246	2009-02-12	465	4	4	16	16	8	8	0	0	0	0		100	100		633	917	993
		247	2009-02-13	466	4	4	16	16	8	8	0	0	0	0		100	100		563	758	920
		248	2009-02-14	467	4	4	16	16	8	8	1	1	0	0		100	100		496	986	1109
		249	2009-02-16	469	4	4	16	16	8	8	0	0	0	0		100	100		446	1162	1043
		250	2009-02-17	470	4	4	16	14	8	8	0	0	0	0		100	87.5		547	789	1428
		251	2009-02-18	471	4	4	16	15	8	8	0	0	0	0		100	93.8		606	973	817
		252	2009-02-19	472	4	4	16	16	8	8	0	0	1	1		100	100		465	1404	1019
		253	2009-02-20	473	4	4	16	16	8	8	0	0	0	0		100	100		875	1014	1203
		254	2009-02-21	474	4	4	16	16	8	8	0	0	0	0		100	100		559	958	1143
		255	2009-02-23	476	4	4	16	16	8	8	0	0	0	0		100	100		504	1073	666
		256	2009-02-24	477	4	4	16	16	8	8	1	0	0	0		100	100		816	725	785
		257	2009-02-25	478	4	4	16	16	8	8	0	0	0	0		100	100		871	833	650
		258	2009-02-26	479	4	4	16	16	8	8	0	0	0	0		100	100		594	880	754
		259	2009-02-27	480	4	4	16	16	8	8	0	0	0	0		100	100		426	847	746
		260	2009-02-28	481	4	4	16	14	8	8	0	0	1	1		100	87.5		566	886	807
		Average										75		96.9		97.5	92.5		727	889	931

## Sheet: Pal Test
Pal
"What-did-you-choose?" Test
							Visual Search				What-did-you-choose Test					%Cor			Response Time (ms)
					MTS		homoDSTs		heteroDSTs		homoDSTs		heteroDSTs				Visual Search			Visual Search
		Session	Date	Days from 1st session	Total	Cor	Total	Cor	Total	Cor	Total	Cor	Total	Cor		MTS	homoDSTs		MTS	homoDSTs	heteroDSTs
		1	2007-11-05	0	nc		16	15	8	8	0	0	0	0			93.8			1735	2449
		2	2007-11-06	1	nc		16	15	8	8	0	0	0	0			93.8			1567	2326
		3	2007-11-26	21	4	4	16	14	8	8	0	0	0	0		100	87.5		489	1587	4045
		4	2007-11-29	24	4	4	16	16	8	8	1	1	0	0		100	100		793	989	3326
		5	2007-12-03	28	4	4	16	16	8	8	0	0	0	0		100	100		750	1159	2604
		6	2007-12-04	29	4	4	16	16	8	8	0	0	0	0		100	100		644	1190	3074
		7	2007-12-05	30	4	4	16	14	8	8	0	0	0	0		100	87.5		1020	1091	2359
		8	2007-12-06	31	4	4	16	16	8	8	0	0	1	1		100	100		2004	1438	1980
		9	2007-12-10	35	4	4	16	15	8	8	0	0	0	0		100	93.8		645	1051	1771
		10	2007-12-11	36	4	4	16	15	8	8	0	0	0	0		100	93.8		805	970	1457
		11	2007-12-13	38	4	4	16	16	8	8	0	0	0	0		100	100		653	1304	1963
		12	2007-12-14	39	4	4	16	16	8	8	1	1	0	0		100	100		754	1860	2727
		13	2007-12-17	42	4	4	16	15	8	8	0	0	0	0		100	93.8		730	1265	1461
		14	2007-12-19	44	4	4	16	16	8	8	0	0	0	0		100	100		867	1236	1486
		15	2007-12-20	45	4	4	16	14	8	8	0	0	0	0		100	87.5		707	2207	1973
		16	2007-12-25	50	4	4	16	15	8	8	0	0	1	1		100	93.8		703	1637	2264
		17	2008-01-07	63	4	4	16	14	8	8	0	0	1	1		100	87.5		727	1143	1506
		18	2008-01-10	66	4	4	16	15	8	8	0	0	0	0		100	93.8		629	1328	3146
		19	2008-01-15	71	4	4	16	16	8	8	0	0	0	0		100	100		1340	1261	1156
		20	2008-01-18	74	4	4	16	16	8	8	0	0	0	0		100	100		793	1337	1803
		21	2008-01-19	75	4	3	16	15	8	8	1	1	0	0		75	93.8		703	1114	1363
		22	2008-01-22	78	4	4	16	16	8	8	0	0	0	0		100	100		914	1926	2608
		23	2008-01-23	79	4	3	16	15	8	8	0	0	0	0		75	93.8		802	1402	2092
		24	2008-01-26	82	4	3	16	13	8	8	0	0	0	0		75	81.3		756	1074	1436
		25	2008-01-29	85	4	4	16	13	8	8	0	0	1	1		100	81.3		684	961	1153
		26	2008-01-31	87	4	4	16	15	8	8	0	0	0	0		100	93.8		621	1392	2043
		27	2008-02-01	88	4	4	16	15	8	8	0	0	0	0		100	93.8		1848	1682	2258
		28	2008-02-06	93	4	4	16	14	8	8	0	0	0	0		100	87.5		715	1009	1486
		29	2008-02-07	94	4	4	16	14	8	8	0	0	0	0		100	87.5		656	1109	2166
		30	2008-02-08	95	4	4	16	16	8	8	1	1	0	0		100	100		594	1328	2541
		31	2008-02-12	99	4	4	16	15	8	8	0	0	0	0		100	93.8		567	1178	1715
		32	2008-02-15	102	4	4	16	15	8	8	0	0	0	0		100	93.8		707	1305	1887
		33	2008-02-16	103	4	4	16	16	8	8	0	0	0	0		100	100		610	1194	1967
		34	2008-02-18	105	4	4	16	16	8	8	0	0	1	1		100	100		922	1395	2930
		35	2008-02-20	107	4	4	16	16	8	8	0	0	0	0		100	100		547	1254	1482
		36	2008-02-21	108	4	4	16	15	8	8	0	0	0	0		100	93.8		602	1219	2180
		37	2008-02-22	109	4	4	16	15	8	8	0	0	0	0		100	93.8		856	1088	1223
		38	2008-02-23	110	4	3	16	16	8	8	1	1	0	0		75	100		599	1003	1258
		39	2008-02-26	113	4	3	16	14	8	8	0	0	0	0		75	87.5		666	1355	1700
		40	2008-03-01	117	4	4	16	15	8	8	0	0	0	0		100	93.8		1000	1533	3170
		41	2008-03-03	119	4	4	16	16	8	8	0	0	0	0		100	100		648	1156	2559
		42	2008-03-05	121	4	4	16	16	8	8	0	0	1	1		100	100		527	1796	2268
		43	2008-03-07	123	4	4	16	16	8	8	0	0	0	0		100	100		645	1577	1510
		44	2008-03-10	126	4	4	16	16	8	8	0	0	0	0		100	100		879	1796	2193
		45	2008-03-13	129	4	4	16	16	8	8	0	0	0	0		100	100		625	1396	2278
		46	2008-03-17	133	4	4	16	13	8	8	1	1	0	0		100	81.3		945	1730	2629
		47	2008-03-24	140	4	4	16	16	8	8	0	0	0	0		100	100		840	1527	3197
		48	2008-04-01	148	4	4	16	15	8	8	0	0	0	0		100	93.8		680	981	1229
		49	2008-04-02	149	4	4	16	12	8	8	0	0	0	0		100	75		567	1307	1989
		50	2008-04-03	150	4	4	16	16	8	8	0	0	1	1		100	100		558	784	1111
		51	2008-04-04	151	4	4	16	15	8	8	0	0	0	0		100	93.8		562	904	2467
		52	2008-04-05	152	4	4	16	16	8	8	0	0	0	0		100	100		1059	1201	2084
		53	2008-04-07	154	4	4	16	15	8	8	0	0	0	0		100	93.8		773	1115	1795
		54	2008-04-10	157	4	4	16	14	8	8	1	1	0	0		100	87.5		699	1415	2728
		55	2008-04-14	161	4	4	16	14	8	8	0	0	0	0		100	87.5		641	1148	1992
		56	2008-04-15	162	4	4	16	15	8	8	0	0	0	0		100	93.8		621	1971	2453
		57	2008-04-16	163	4	4	16	13	8	8	0	0	0	0		100	81.3		512	1016	2455
		58	2008-04-17	164	4	4	16	16	8	8	0	0	1	1		100	100		617	1245	2324
		59	2008-04-18	165	4	4	16	15	8	8	0	0	0	0		100	93.8		762	2371	2211
		60	2008-04-19	166	4	4	16	15	8	8	0	0	0	0		100	93.8		785	1392	3016
		61	2008-04-21	168	4	4	16	16	8	8	0	0	0	0		100	100		598	1576	2101
		62	2008-04-22	169	4	4	16	15	8	8	1	1	0	0		100	93.8		602	1652	1330
		63	2008-04-24	171	4	4	16	14	8	8	0	0	0	0		100	87.5		1168	1440	2879
		64	2008-04-26	173	4	4	16	15	8	8	0	0	0	0		100	93.8		664	1742	2049
		65	2008-04-28	175	4	4	16	16	8	8	0	0	0	0		100	100		977	1295	1949
		66	2008-05-01	178	4	4	16	13	8	8	0	0	1	1		100	81.3		606	763	1664
		67	2008-05-02	179	4	4	16	14	8	8	0	0	0	0		100	87.5		746	1120	1203
		68	2008-05-09	186	4	4	16	16	8	8	0	0	0	0		100	100		683	926	1354
		69	2008-05-10	187	4	4	16	15	8	8	1	0	0	0		100	93.8		1000	1485	1492
		70	2008-05-12	189	4	3	16	15	8	8	0	0	0	0		75	93.8		500	736	1355
		71	2008-05-13	190	4	4	16	15	8	8	0	0	0	0		100	93.8		1242	902	918
		72	2008-05-15	192	4	3	16	16	8	8	0	0	0	0		75	100		1375	922	1467
		73	2008-05-16	193	4	4	16	12	8	8	0	0	1	1		100	75		610	908	893
		74	2008-05-17	194	4	4	16	14	8	8	0	0	0	0		100	87.5		851	921	2205
		75	2008-05-19	196	4	4	16	16	8	8	0	0	0	0		100	100		571	1522	1232
		76	2008-05-21	198	4	4	16	15	8	8	0	0	0	0		100	93.8		527	786	1250
		77	2008-05-26	203	4	4	16	16	8	8	1	1	0	0		100	100		871	1153	1598
		78	2008-05-27	204	4	4	16	14	8	8	0	0	0	0		100	87.5		797	1011	1252
		79	2008-06-02	210	4	4	16	12	8	8	0	0	0	0		100	75		629	1025	1225
		80	2008-06-03	211	4	4	16	15	8	8	0	0	0	0		100	93.8		1043	858	936
		81	2008-06-05	213	4	4	16	16	8	8	0	0	0	0		100	100		859	987	1150
		82	2008-06-06	214	4	4	16	16	8	8	0	0	0	0		100	100		672	998	1279
		83	2008-06-09	217	4	4	16	14	8	8	0	0	0	0		100	87.5		1266	928	1432
		84	2008-06-11	219	4	4	16	14	8	8	1	0	0	0		100	87.5		691	902	1164
		85	2008-06-12	220	4	4	16	14	8	8	0	0	0	0		100	87.5		554	764	1215
		86	2008-06-13	221	4	4	16	13	8	8	0	0	0	0		100	81.3		993	939	1174
		87	2008-06-14	222	4	4	16	15	8	8	0	0	0	0		100	93.8		739	814	807
		88	2008-06-16	224	4	4	16	14	8	8	0	0	1	1		100	87.5		571	772	951
		89	2008-06-18	226	4	4	16	15	8	8	0	0	0	0		100	93.8		574	1056	1123
		90	2008-06-19	227	4	4	16	15	8	8	0	0	0	0		100	93.8		465	682	1746
		91	2008-06-20	228	4	4	16	13	8	8	0	0	1	1		100	81.3		453	752	975
		92	2008-06-23	231	4	4	16	16	8	8	0	0	0	0		100	100		617	1053	1219
		93	2008-06-24	232	4	4	16	14	8	8	0	0	0	0		100	87.5		543	1025	1506
		94	2008-06-25	233	4	4	16	16	8	8	0	0	0	0		100	100		598	995	1151
		95	2008-06-26	234	4	4	16	16	8	8	1	1	0	0		100	100		797	976	1348
		96	2008-06-27	235	4	4	16	16	8	8	0	0	0	0		100	100		824	849	916
		97	2008-06-30	238	4	4	16	15	8	8	0	0	0	0		100	93.8		637	1036	1432
		98	2008-07-01	239	4	3	16	13	8	8	0	0	0	0		75	81.3		1005	1726	1065
		99	2008-07-02	240	4	4	16	14	8	8	0	0	1	1		100	87.5		750	929	877
		100	2008-07-03	241	4	3	4	4	1	1	0	0	0	0		75	100		1239	860	843
		101	2008-07-07	245	4	4	16	14	8	8	0	0	0	0		100	87.5		504	745	1231
		102	2008-07-08	246	4	3	16	15	8	8	0	0	0	0		75	93.8		677	879	1067
		103	2008-07-09	247	4	4	16	15	8	8	0	0	0	0		100	93.8		656	995	1262
		104	2008-07-10	248	4	4	16	12	8	8	1	0	0	0		100	75		641	915	813
		105	2008-07-11	249	4	4	16	15	8	8	0	0	0	0		100	93.8		621	814	1301
		106	2008-07-14	252	4	4	16	15	8	8	0	0	0	0		100	93.8		692	842	1287
		107	2008-07-15	253	4	4	16	16	8	8	0	0	0	0		100	100		594	931	1578
		108	2008-07-16	254	4	4	16	12	8	8	0	0	1	1		100	75		590	1188	674
		109	2008-07-17	255	4	4	16	14	8	8	0	0	0	0		100	87.5		500	1101	998
		110	2008-07-24	262	4	4	16	15	8	8	0	0	0	0		100	93.8		621	848	1236
		111	2008-07-25	263	4	4	16	13	8	8	0	0	0	0		100	81.3		754	970	957
		112	2008-07-26	264	4	4	16	15	8	8	1	1	0	0		100	93.8		640	1011	1186
		113	2008-07-28	266	4	4	16	13	8	8	0	0	0	0		100	81.3		867	751	1365
		114	2008-07-29	267	4	4	16	15	8	8	0	0	0	0		100	93.8		664	896	1215
		115	2008-07-30	268	4	4	16	15	8	8	0	0	0	0		100	93.8		617	933	1170
		116	2008-07-31	269	4	4	16	16	8	8	0	0	1	1		100	100		637	893	862
		117	2008-08-01	270	4	4	16	14	8	8	0	0	0	0		100	87.5		594	1108	1019
		118	2008-08-11	280	4	4	16	12	8	8	0	0	0	0		100	75		879	875	1002
		119	2008-08-12	281	4	4	16	14	8	8	0	0	0	0		100	87.5		512	830	854
		120	2008-08-13	282	4	4	16	15	8	8	1	1	0	0		100	93.8		543	895	885
		121	2008-08-16	285	4	4	16	14	8	8	0	0	0	0		100	87.5		625	786	1156
		122	2008-08-18	287	4	4	16	16	8	8	0	0	0	0		100	100		891	896	975
		123	2008-08-19	288	4	4	16	14	8	8	0	0	0	0		100	87.5		832	909	850
		124	2008-08-20	289	4	4	16	16	8	8	0	0	1	1		100	100		965	794	1404
		125	2008-08-22	291	4	4	16	15	8	8	0	0	0	0		100	93.8		508	905	1125
		126	2008-08-23	292	4	4	16	15	8	8	0	0	0	0		100	93.8		625	712	1072
		127	2008-08-26	295	4	4	16	16	8	8	0	0	0	0		100	100		688	923	871
		128	2008-08-27	296	4	4	16	14	8	8	1	1	0	0		100	87.5		668	1222	1653
		129	2008-09-06	306	4	4	16	13	8	8	0	0	0	0		100	81.3		641	797	969
		130	2008-09-08	308	4	4	16	13	8	8	0	0	0	0		100	81.3		582	655	693
		131	2008-09-09	309	4	4	16	13	8	8	0	0	0	0		100	81.3		497	804	950
		132	2008-09-10	310	4	4	16	16	8	8	0	0	1	0		100	100		527	806	2135
		133	2008-09-11	311	4	4	16	15	8	8	0	0	0	0		100	93.8		703	1047	856
		134	2008-09-17	317	4	4	16	12	8	8	0	0	0	0		100	75		633	869	801
		135	2008-09-19	319	4	4	16	15	8	8	0	0	0	0		100	93.8		637	1084	1256
		136	2008-09-22	322	4	4	16	16	8	8	1	1	0	0		100	100		563	1032	779
		137	2008-09-26	326	4	4	16	16	8	8	0	0	0	0		100	100		531	960	1018
		138	2008-09-30	330	4	4	16	15	8	8	0	0	0	0		100	93.8		680	871	1217
		139	2008-10-01	331	4	4	16	16	8	8	0	0	0	0		100	100		785	940	1006
		140	2008-10-02	332	4	4	16	16	8	8	0	0	1	1		100	100		605	1128	1403
		141	2008-10-03	333	4	4	16	16	8	8	0	0	0	0		100	100		1293	1226	2148
		142	2008-10-04	334	4	4	16	15	8	8	0	0	0	0		100	93.8		1012	986	1127
		143	2008-10-06	336	4	4	16	14	8	8	0	0	0	0		100	87.5		711	913	1326
		144	2008-10-07	337	4	4	16	16	8	8	1	1	0	0		100	100		1340	987	1209
		145	2008-10-08	338	4	4	16	14	8	8	0	0	0	0		100	87.5		695	927	1080
		146	2008-10-09	339	4	4	16	15	8	8	0	0	0	0		100	93.8		676	858	916
		147	2008-10-10	340	4	4	16	16	8	8	0	0	0	0		100	100		621	1158	1211
		148	2008-10-11	341	4	4	16	14	8	8	0	0	1	1		100	87.5		891	858	1074
		149	2008-10-15	345	4	4	16	16	8	8	0	0	0	0		100	100		594	850	1285
		150	2008-10-16	346	4	4	16	15	8	8	0	0	0	0		100	93.8		633	1063	1551
		151	2008-10-17	347	4	4	16	16	8	8	0	0	0	0		100	100		680	1491	1209
		152	2008-10-18	348	4	3	16	16	8	8	1	0	0	0		75	100		786	954	836
		153	2008-10-22	352	4	4	16	15	8	8	0	0	0	0		100	93.8		613	840	691
		154	2008-10-23	353	4	4	16	14	8	8	0	0	0	0		100	87.5		515	827	969
		155	2008-10-24	354	4	4	16	15	8	8	0	0	0	0		100	93.8		742	821	1067
		156	2008-10-25	355	4	4	16	16	8	8	0	0	1	1		100	100		547	1230	1125
		157	2008-10-27	357	4	4	16	15	8	8	0	0	0	0		100	93.8		578	1019	1108
		158	2008-10-29	359	4	4	16	16	8	8	0	0	0	0		100	100		539	875	1123
		159	2008-10-30	360	4	4	16	16	8	8	1	1	0	0		100	100		672	1089	1434
		160	2008-10-31	361	4	4	16	16	8	8	0	0	0	0		100	100		551	1685	927
		161	2008-11-01	362	4	4	16	14	8	8	0	0	0	0		100	87.5		918	782	1084
		162	2008-11-04	365	4	4	16	16	8	8	0	0	0	0		100	100		652	723	1387
		163	2008-11-05	366	4	4	16	16	8	8	0	0	1	1		100	100		535	814	1049
		164	2008-11-06	367	4	4	16	15	8	8	0	0	0	0		100	93.8		551	1006	1069
		165	2008-11-07	368	4	4	16	16	8	8	0	0	0	0		100	100		422	1652	1102
		166	2008-11-08	369	4	4	16	16	8	8	0	0	0	0		100	100		594	742	1894
		167	2008-11-10	371	4	4	16	15	8	8	1	0	0	0		100	93.8		680	743	910
		168	2008-11-11	372	4	3	16	15	8	8	0	0	0	0		75	93.8		448	1063	1383
		169	2008-11-12	373	4	4	16	15	8	8	0	0	0	0		100	93.8		539	815	1016
		170	2008-11-13	374	4	4	16	16	8	8	0	0	0	0		100	100		875	859	1076
		171	2008-11-14	375	4	4	16	14	8	8	0	0	0	0		100	87.5		598	962	1174
		172	2008-11-19	380	4	4	16	15	8	8	0	0	1	1		100	93.8		555	807	983
		173	2008-11-20	381	4	3	16	15	8	8	0	0	0	0		75	93.8		880	963	781
		174	2008-11-21	382	4	4	16	15	8	8	0	0	0	0		100	93.8		578	1037	1065
		175	2008-11-22	383	4	4	16	16	8	8	0	0	0	0		100	100		703	780	1135
		176	2008-11-25	386	4	4	16	16	8	8	1	1	0	0		100	100		610	1031	1686
		177	2008-11-26	387	4	4	16	15	8	8	0	0	0	0		100	93.8		637	1180	1217
		178	2008-11-27	388	4	4	16	16	8	8	0	0	0	0		100	100		578	1208	904
		179	2008-11-28	389	4	4	16	16	8	8	0	0	0	0		100	100		512	944	1129
		180	2008-12-01	392	4	4	16	16	8	8	0	0	1	1		100	100		520	1119	1881
		181	2008-12-04	395	4	3	16	16	8	8	0	0	0	0		75	100		719	1081	1310
		182	2008-12-06	397	4	4	16	15	8	8	0	0	0	0		100	93.8		687	1504	1494
		183	2008-12-08	399	4	4	16	16	8	8	0	0	0	0		100	100		621	995	1141
		184	2008-12-09	400	4	3	16	16	8	8	1	1	0	0		75	100		693	1045	1320
		185	2008-12-10	401	4	4	16	15	8	8	0	0	0	0		100	93.8		520	1377	2186
		186	2008-12-11	402	4	4	16	15	8	8	0	0	0	0		100	93.8		512	897	971
		187	2008-12-12	403	4	4	16	16	8	8	0	0	0	0		100	100		844	1282	2066
		188	2008-12-13	404	4	4	16	16	8	8	0	0	1	1		100	100		492	862	1395
		189	2008-12-15	406	4	4	16	15	8	8	0	0	0	0		100	93.8		547	858	1033
		190	2008-12-17	408	4	4	16	15	8	8	0	0	0	0		100	93.8		516	1047	1090
		191	2008-12-18	409	4	4	16	13	8	8	0	0	0	0		100	81.3		559	965	1135
		192	2008-12-19	410	4	4	16	15	8	8	1	0	0	0		100	93.8		551	1089	1057
		193	2008-12-22	413	4	4	16	15	8	8	0	0	0	0		100	93.8		434	929	1416
		194	2008-12-24	415	4	3	16	16	8	8	0	0	0	0		75	100		651	990	752
		195	2008-12-25	416	4	4	16	14	8	8	0	0	0	0		100	87.5		7258	1232	1158
		196	2008-12-26	417	4	4	16	15	8	8	0	0	1	1		100	93.8		605	1848	2737
		197	2008-12-27	418	4	4	16	15	8	8	0	0	0	0		100	93.8		524	823	1299
		198	2009-01-05	427	4	4	16	15	8	8	0	0	0	0		100	93.8		774	854	1237
		199	2009-01-06	428	4	4	16	12	8	8	0	0	0	0		100	75		582	957	1084
		200	2009-01-07	429	4	4	16	14	8	8	1	1	0	0		100	87.5		535	1131	1016
		201	2009-01-08	430	4	4	16	15	8	8	0	0	0	0		100	93.8		555	1191	955
		202	2009-01-09	431	4	4	16	16	8	8	0	0	0	0		100	100		515	906	1410
		203	2009-01-10	432	4	4	16	16	8	8	0	0	0	0		100	100		715	1249	1471
		204	2009-01-19	441	4	4	16	15	8	8	0	0	1	1		100	93.8		684	1035	1401
		205	2009-01-20	442	4	4	16	16	8	8	0	0	0	0		100	100		539	1909	1865
		206	2009-01-23	445	4	4	16	16	8	8	0	0	0	0		100	100		547	905	1518
		207	2009-01-24	446	4	4	16	15	8	8	0	0	0	0		100	93.8		488	1033	1174
		208	2009-01-27	449	4	4	16	14	8	8	1	1	0	0		100	87.5		453	839	856
		209	2009-01-29	451	4	4	16	15	8	8	0	0	0	0		100	93.8		985	1172	1492
		210	2009-01-30	452	4	4	16	16	8	8	0	0	0	0		100	100		633	1173	902
		211	2009-01-31	453	4	4	16	15	8	8	0	0	1	1		100	93.8		531	825	1465
		212	2009-02-02	455	4	4	16	15	8	8	0	0	0	0		100	93.8		492	1000	967
		213	2009-02-03	456	4	4	16	15	8	8	0	0	0	0		100	93.8		605	906	908
		214	2009-02-04	457	4	4	16	16	8	8	0	0	0	0		100	100		508	1064	980
		215	2009-02-05	458	4	4	16	16	8	8	1	1	0	0		100	100		457	1082	1209
		216	2009-02-06	459	4	3	16	15	8	8	0	0	0	0		75	93.8		630	1376	1190
		217	2009-02-07	460	4	3	16	13	8	8	0	0	0	0		75	81.3		489	950	1137
		218	2009-02-09	462	4	4	16	12	8	8	0	0	0	0		100	75		664	1292	1221
		219	2009-02-10	463	4	4	16	16	8	8	0	0	1	1		100	100		594	900	858
		220	2009-02-13	466	4	4	16	15	8	8	0	0	0	0		100	93.8		469	915	832
		221	2009-02-14	467	4	4	16	16	8	8	0	0	0	0		100	100		676	1083	1289
		222	2009-02-16	469	4	4	16	15	8	8	0	0	0	0		100	93.8		504	956	949
		223	2009-02-18	471	4	4	16	15	8	8	1	1	0	0		100	93.8		531	1022	1043
		224	2009-02-19	472	4	4	16	16	8	8	0	0	0	0		100	100		746	981	988
		225	2009-02-20	473	4	4	16	16	8	8	0	0	0	0		100	100		472	984	834
		226	2009-02-21	474	4	4	16	16	8	8	0	0	0	0		100	100		535	976	1141
		227	2009-02-23	476	4	4	16	16	8	8	0	0	1	1		100	100		637	879	727
		228	2009-02-24	477	4	4	16	16	8	8	0	0	0	0		100	100		793	899	2383
		229	2009-02-25	478	4	4	16	16	8	8	0	0	0	0		100	100		3074	969	2022
		230	2009-02-26	479	4	4	16	16	8	8	0	0	0	0		100	100		465	924	2273
		231	2009-02-27	480	4	4	16	16	8	8	1	1	0	0		100	100		687	889	1157
		232	2009-02-28	481	4	4	16	15	8	8	0	0	0	0		100	93.8		567	1095	838
		233	2009-03-02	483	4	4	16	16	8	8	0	0	0	0		100	100		528	895	2051
		234	2009-03-03	484	4	4	16	15	8	8	0	0	0	0		100	93.8		660	774	1104
		235	2009-03-04	485	4	4	16	15	8	8	0	0	1	1		100	93.8		680	1109	1088
		236	2009-03-05	486	4	4	16	15	8	8	0	0	0	0		100	93.8		1078	1108	750
		237	2009-03-06	487	4	4	16	16	8	8	0	0	0	0		100	100		617	1149	1217
		238	2009-03-09	490	4	4	16	15	8	8	0	0	0	0		100	93.8		559	884	875
		239	2009-03-10	491	4	4	16	15	8	8	1	1	0	0		100	93.8		610	938	979
		240	2009-03-11	492	4	4	16	15	8	8	0	0	0	0		100	93.8		805	1307	1211
		241	2009-03-12	493	4	4	16	14	8	8	0	0	0	0		100	87.5		652	861	883
		242	2009-03-13	494	4	4	16	14	8	8	0	0	0	0		100	87.5		586	865	939
		243	2009-03-14	495	4	4	16	16	8	8	0	0	1	1		100	100		551	855	689
		244	2009-03-16	497	4	4	16	14	8	8	0	0	0	0		100	87.5		539	1240	881
		245	2009-03-17	498	4	4	16	15	8	8	0	0	0	0		100	93.8		559	880	1086
		246	2009-03-19	500	4	4	16	15	8	8	0	0	0	0		100	93.8		594	1027	857
		247	2009-03-26	507	4	4	16	16	8	8	1	1	0	0		100	100		570	837	1672
		248	2009-03-27	508	4	4	16	16	8	8	0	0	0	0		100	100		629	746	994
		249	2009-03-30	511	4	4	16	16	8	8	0	0	0	0		100	100		477	937	822
		250	2009-03-31	512	4	4	16	16	8	8	0	0	0	0		100	100		488	762	1037
		251	2009-04-01	513	4	4	16	15	8	8	0	0	1	1		100	93.8		750	697	902
		252	2009-04-02	514	4	4	16	14	8	8	0	0	0	0		100	87.5		457	857	1489
		253	2009-04-03	515	4	4	16	16	8	8	0	0	0	0		100	100		610	745	1100
		254	2009-04-04	516	4	4	16	16	8	8	0	0	0	0		100	100		633	1034	1272
		255	2009-04-06	518	4	4	16	14	8	8	1	1	0	0		100	87.5		574	1629	1670
		Average										81.3		96.9		98.2	93.8		721	1083	1432

## Sheet: Pendesa Control Test
Pendesa
Control Test
						Visual Search				2-choice Test				Visual Search Test					%Cor			Response Time (ms)
				MTS		homoDSTs		heteroDSTs		homoDSTs		heteroDSTs		homoDSTs		heteroDSTs				Visual Search			Visual Search
		Session	Date	Total	Cor	Total	Cor	Total	Cor	Total	Cor	Total	Cor	Total	Cor	Total	Cor		MTS	homoDSTs		MTS	homoDSTs	heteroDSTs
		1	2009-09-02	2	2	12	10	8	8	1	1	1	0	1	1	1	0		100	83.3		640	695	840
		2	2009-09-03	2	2	12	12	8	8	1	0	1	1	1	1	1	0		100	100		709	935	795
		3	2009-09-04	2	2	12	11	8	8	1	1	1	1	1	1	1	0		100	91.7		635	687	845
		4	2009-09-07	2	2	12	12	8	8	1	1	1	1	1	1	1	0		100	100		756	922	1260
		5	2009-09-08	2	2	12	12	8	8	1	1	1	0	1	1	1	0		100	100		462	862	918
		6	2009-09-09	2	2	12	12	8	8	1	0	1	0	1	1	1	0		100	100		618	842	799
		7	2009-09-11	2	2	12	11	8	8	1	0	1	0	1	1	1	0		100	91.7		859	687	930
		8	2009-09-14	2	2	12	12	8	8	1	1	1	1	1	1	1	0		100	100		413	818	732
		9	2009-09-18	2	2	12	12	8	8	1	1	1	0	1	1	1	0		100	100		448	736	894
		10	2009-09-28	2	2	12	11	8	8	1	0	1	0	1	1	1	0		100	91.7		758	652	648
		11	2009-09-29	2	2	12	10	8	8	1	0	1	0	1	1	1	0		100	83.3		647	592	793
		12	2009-10-01	2	2	12	11	8	8	1	1	1	0	1	1	1	0		100	91.7		501	574	664
		13	2009-10-05	2	2	12	11	8	8	1	1	1	0	1	1	1	0		100	91.7		643	713	653
		14	2009-10-06	2	2	12	12	8	8	1	0	1	1	1	1	1	0		100	100		469	776	672
		15	2009-10-13	2	2	12	11	8	8	1	1	1	1	1	1	1	0		100	91.7		785	809	909
		16	2009-10-15	2	2	12	12	8	8	1	0	1	0	1	1	1	0		100	100		578	836	590
		17	2009-10-16	2	2	12	12	8	8	1	1	1	1	1	1	1	1		100	100		791	746	767
		18	2009-10-21	2	2	12	12	8	8	1	1	1	0	1	1	1	1		100	100		495	712	791
		19	2009-10-23	2	2	12	12	8	8	1	0	1	1	1	1	1	0		100	100		400	687	607
		20	2009-10-26	2	2	12	12	8	8	1	1	1	1	1	1	1	0		100	100		569	599	662
		21	2009-10-27	2	1	12	12	8	8	1	0	1	0	1	1	1	0		50	100		578	926	600
		22	2009-10-29	2	2	12	10	8	8	1	1	1	0	1	1	1	0		100	83.3		469	538	788
		23	2009-10-30	2	2	12	10	8	8	1	1	1	1	1	1	1	0		100	83.3		758	708	643
		24	2009-11-02	2	2	12	11	8	8	1	0	1	1	1	1	1	0		100	91.7		414	697	642
		25	2009-11-09	2	2	12	12	8	8	1	0	1	1	1	1	1	0		100	100		629	871	698
		26	2009-11-10	2	2	12	11	8	8	1	0	1	1	1	1	1	0		100	91.7		553	675	531
		27	2009-11-12	2	2	12	11	8	8	1	0	1	1	1	0	1	0		100	91.7		573	972	604
		28	2009-11-17	2	2	12	11	8	8	1	1	1	0	1	1	1	0		100	91.7		482	678	1197
		29	2009-11-18	2	2	12	11	8	8	1	0	1	0	1	1	1	0		100	91.7		467	674	808
		30	2009-11-21	2	2	12	11	8	8	1	1	1	0	1	1	1	0		100	91.7		891	554	768
		31	2009-11-24	2	2	12	12	8	8	1	1	1	1	1	1	1	0		100	100		631	1529	652
		32	2009-11-25	2	2	12	11	8	8	1	0	1	1	1	1	1	0		100	91.7		994	593	922
		Average									53.1		50		96.9		6.3		98.4	94.5		613	759	769

## Sheet: Ayumu  Control Test
Ayumu
Control Test
						Visual Search				2-choice Test				Visual Search Test					%Cor			Response Time (ms)
				MTS		homoDSTs		heteroDSTs		homoDSTs		heteroDSTs		homoDSTs		heteroDSTs				Visual Search			Visual Search
		Session	Date	Total	Cor	Total	Cor	Total	Cor	Total	Cor	Total	Cor	Total	Cor	Total	Cor		MTS	homoDSTs		MTS	homoDSTs	heteroDSTs
		1	2009-08-11	2	2	12	11	8	8	1	1	1	0	1	1	1	0		100	91.7		407	544	791
		2	2009-08-12	2	2	12	12	8	8	1	1	1	1	1	1	1	0		100	100		391	728	1047
		3	2009-08-14	2	2	12	11	8	8	1	0	1	1	1	1	1	1		100	91.7		485	585	729
		4	2009-08-17	2	2	12	12	8	8	1	0	1	1	1	1	1	0		100	100		766	695	820
		5	2009-08-18	2	2	12	12	8	8	1	0	1	1	1	1	1	1		100	100		571	882	936
		6	2009-08-31	2	2	12	12	8	8	1	0	1	0	1	1	1	1		100	100		446	720	971
		7	2009-09-01	2	2	12	12	8	8	1	0	1	1	1	1	1	1		100	100		406	667	1133
		8	2009-09-02	2	2	12	12	8	8	1	0	1	0	1	1	1	0		100	100		1039	599	985
		9	2009-09-03	2	2	12	12	8	8	1	0	1	0	1	1	1	0		100	100		500	869	992
		10	2009-09-04	2	2	12	12	8	8	1	0	1	0	1	0	1	0		100	100		524	854	930
		11	2009-09-07	2	2	12	12	8	8	1	1	1	0	1	1	1	1		100	100		1110	899	1369
		12	2009-09-08	2	2	12	12	8	8	1	1	1	1	1	1	1	0		100	100		1031	1000	1449
		13	2009-09-09	2	2	12	12	8	8	1	0	1	1	1	1	1	1		100	100		493	724	779
		14	2009-09-11	2	2	12	12	8	8	1	0	1	0	1	1	1	1		100	100		493	835	1158
		15	2009-09-14	2	2	12	12	8	8	1	1	1	0	1	1	1	0		100	100		1055	902	2037
		16	2009-09-15	2	2	12	12	8	8	1	0	1	1	1	1	1	0		100	100		453	747	1002
		17	2009-09-18	2	2	12	12	8	8	1	0	1	1	1	1	1	0		100	100		680	1022	1383
		18	2009-09-28	2	2	12	12	8	8	1	1	1	0	1	1	1	0		100	100		485	772	982
		19	2009-09-29	2	2	12	11	8	8	1	0	1	0	1	1	1	0		100	91.7		618	768	1219
		20	2009-10-01	2	2	12	12	8	8	1	0	1	1	1	1	1	0		100	100		977	1052	1312
		21	2009-10-05	2	2	12	12	8	8	1	0	1	1	1	1	1	0		100	100		680	995	830
		22	2009-10-06	2	2	12	12	8	8	1	0	1	0	1	1	1	0		100	100		602	1410	1193
		23	2009-10-07	2	2	12	12	8	8	1	0	1	1	1	1	1	0		100	100		516	647	856
		24	2009-10-13	2	2	12	12	8	8	1	1	1	0	1	1	1	0		100	100		485	1071	1362
		25	2009-10-15	2	2	12	12	8	8	1	1	1	0	1	1	1	0		100	100		664	1107	1525
		26	2009-10-16	2	2	12	12	8	8	1	0	1	0	1	1	1	0		100	100		680	789	1723
		27	2009-10-21	2	2	12	11	8	8	1	0	1	0	1	1	1	0		100	91.7		476	785	1723
		28	2009-10-23	2	2	12	12	8	8	1	0	1	0	1	1	1	1		100	100		1039	1147	1155
		29	2009-10-27	2	2	12	10	8	8	1	0	1	1	1	1	1	0		100	83.3		625	2727	1264
		30	2009-10-29	2	2	12	12	8	8	1	0	1	0	1	1	1	1		100	100		438	844	1022
		31	2009-10-30	2	2	12	12	8	8	1	1	1	0	1	1	1	0		100	100		1500	950	1395
		32	2009-11-02	2	2	12	12	8	8	1	1	1	0	1	1	1	1		100	100		563	849	1115
		Average									31.3		40.6		96.9		31.3		100	98.4		662	912	1162

## Sheet: Cleo  Control Test
Cleo
Control Test
						Visual Search				2-choice Test				Visual Search Test					%Cor			Response Time (ms)
				MTS		homoDSTs		heteroDSTs		homoDSTs		heteroDSTs		homoDSTs		heteroDSTs				Visual Search			Visual Search
		Session	Date	Total	Cor	Total	Cor	Total	Cor	Total	Cor	Total	Cor	Total	Cor	Total	Cor		MTS	homoDSTs		MTS	homoDSTs	heteroDSTs
		1	2009-05-16	2	2	12	12	8	8	1	0	1	0	1	1	1	0		100	100		508	797	934
		2	2009-05-18	2	1	12	11	8	8	1	0	1	0	1	1	1	0		50	91.7		453	621	699
		3	2009-05-19	2	2	12	11	8	8	1	0	1	0	1	1	1	0		100	91.7		383	734	533
		4	2009-05-20	2	2	12	9	8	8	1	0	1	1	1	0	1	0		100	75		399	544	613
		5	2009-05-21	2	2	12	11	8	8	1	1	1	1	1	1	1	0		100	91.7		430	594	551
		6	2009-05-22	2	2	12	12	8	8	1	1	1	0	1	1	1	0		100	100		438	692	594
		7	2009-05-23	2	2	12	11	8	8	1	1	1	1	1	1	1	0		100	91.7		500	699	664
		8	2009-05-25	2	2	12	12	8	8	1	0	1	0	1	1	1	0		100	100		602	968	695
		9	2009-05-26	2	2	12	10	8	8	1	0	1	0	1	1	1	1		100	83.3		453	607	709
		10	2009-05-27	2	2	12	10	8	8	1	1	1	1	1	1	1	0		100	83.3		438	513	533
		11	2009-05-28	2	2	12	9	8	8	1	1	1	1	1	1	1	0		100	75		571	665	609
		12	2009-05-29	2	2	12	11	8	8	1	0	1	0	1	1	1	1		100	91.7		743	740	863
		13	2009-05-30	2	1	12	10	8	8	1	1	1	0	1	1	1	0		50	83.3		500	647	604
		14	2009-06-01	2	2	12	11	8	8	1	0	1	1	1	1	1	0		100	91.7		789	721	773
		15	2009-06-02	2	2	12	11	8	8	1	1	1	0	1	1	1	0		100	91.7		375	626	680
		16	2009-06-03	2	2	12	11	8	8	1	0	1	1	1	1	1	0		100	91.7		891	669	719
		17	2009-06-04	2	2	12	11	8	8	1	1	1	1	1	1	1	0		100	91.7		547	789	527
		18	2009-06-05	2	2	12	10	8	8	1	0	1	1	1	0	1	0		100	83.3		524	530	518
		19	2009-06-06	2	2	12	12	8	8	1	1	1	0	1	0	1	0		100	100		540	604	502
		20	2009-06-08	2	2	12	9	8	8	1	1	1	0	1	1	1	1		100	75		477	505	584
		21	2009-06-09	2	2	12	11	8	8	1	0	1	1	1	1	1	0		100	91.7		368	715	711
		22	2009-06-10	2	2	12	12	8	8	1	0	1	0	1	1	1	1		100	100		454	693	680
		23	2009-06-11	2	2	12	11	8	8	1	1	1	1	1	1	1	0		100	91.7		437	698	713
		24	2009-06-12	2	2	12	11	8	8	1	1	1	0	1	1	1	0		100	91.7		438	524	523
		25	2009-06-13	2	2	12	12	8	8	1	0	1	0	1	0	1	1		100	100		320	865	551
		26	2009-06-15	2	2	12	10	8	8	1	1	1	0	1	1	1	0		100	83.3		508	996	549
		27	2009-06-17	2	2	12	11	8	8	1	1	1	0	1	1	1	0		100	91.7		594	520	771
		28	2009-06-19	2	2	12	11	8	8	1	1	1	1	1	1	1	0		100	91.7		422	672	619
		29	2009-06-20	2	2	12	9	8	8	1	1	1	1	1	1	1	1		100	75		1305	564	603
		30	2009-06-22	2	2	12	12	8	8	1	0	1	0	1	1	1	0		100	100		641	716	625
		31	2009-06-23	2	2	12	11	8	8	1	1	1	0	1	1	1	1		100	91.7		539	759	526
		32	2009-06-24	2	1	12	12	8	8	1	0	1	0	1	1	1	0		50	100		828	876	789
		Average									53.1		40.6		87.5		21.9		95.3	90.4		544	683	643

## Sheet: Pal  Control Test
Pal
Control Test
						Visual Search				2-choice Test				Visual Search Test					%Cor			Response Time (ms)
				MTS		homoDSTs		heteroDSTs		homoDSTs		heteroDSTs		homoDSTs		heteroDSTs				Visual Search			Visual Search
		Session	Date	Total	Cor	Total	Cor	Total	Cor	Total	Cor	Total	Cor	Total	Cor	Total	Cor		MTS	homoDSTs		MTS	homoDSTs	heteroDSTs
		1	2009-05-16	2	2	12	12	8	8	1	1	1	0	1	1	1	0		100	100		453	786	727
		2	2009-05-18	2	2	12	12	8	8	1	1	1	1	1	1	1	0		100	100		602	1341	820
		3	2009-05-19	2	2	12	9	8	8	1	0	1	0	1	1	1	0		100	75		414	603	832
		4	2009-05-20	2	2	12	12	8	8	1	0	1	0	1	1	1	0		100	100		664	974	936
		5	2009-05-21	2	2	12	10	8	8	1	0	1	0	1	1	1	0		100	83.3		485	801	1244
		6	2009-05-22	2	2	12	11	8	8	1	1	1	1	1	1	1	0		100	91.7		696	887	789
		7	2009-05-23	2	2	12	12	8	8	1	0	1	0	1	0	1	1		100	100		399	725	903
		8	2009-05-25	2	2	12	11	8	8	1	0	1	0	1	1	1	0		100	91.7		735	1029	1168
		9	2009-05-26	2	2	12	10	8	8	1	0	1	0	1	1	1	0		100	83.3		493	771	1123
		10	2009-05-27	2	2	12	12	8	8	1	0	1	1	1	1	1	0		100	100		672	952	1330
		11	2009-05-28	2	2	12	12	8	8	1	0	1	0	1	1	1	0		100	100		3016	1022	982
		12	2009-05-29	2	2	12	12	8	8	1	1	1	1	1	0	1	0		100	100		414	748	776
		13	2009-05-30	2	2	12	11	8	8	1	0	1	1	1	1	1	0		100	91.7		477	836	748
		14	2009-06-01	2	2	12	10	8	8	1	0	1	0	1	1	1	0		100	83.3		461	827	738
		15	2009-06-03	2	2	12	12	8	8	1	0	1	0	1	1	1	0		100	100		664	745	928
		16	2009-06-04	2	2	12	11	8	8	1	0	1	0	1	1	1	0		100	91.7		422	654	740
		17	2009-06-05	2	2	12	10	8	8	1	0	1	0	1	1	1	0		100	83.3		547	736	772
		18	2009-06-06	2	2	12	11	8	8	1	0	1	1	1	1	1	0		100	91.7		453	802	828
		19	2009-06-08	2	2	12	12	8	8	1	1	1	1	1	1	1	0		100	100		688	738	688
		20	2009-06-09	2	2	12	10	8	8	1	1	1	0	1	1	1	0		100	83.3		461	569	775
		21	2009-06-10	2	2	12	10	8	8	1	0	1	0	1	1	1	0		100	83.3		1102	858	842
		22	2009-06-11	2	2	12	11	8	8	1	0	1	0	1	1	1	1		100	91.7		454	1016	830
		23	2009-06-12	2	2	12	12	8	8	1	1	1	1	1	1	1	0		100	100		547	904	869
		24	2009-06-13	2	2	12	10	8	8	1	0	1	0	1	1	1	1		100	83.3		594	630	627
		25	2009-06-15	2	2	12	11	8	8	1	1	1	1	1	1	1	0		100	91.7		485	805	799
		26	2009-06-16	2	2	12	12	8	8	1	0	1	0	1	1	1	0		100	100		390	711	1250
		27	2009-06-17	2	2	12	10	8	8	1	0	1	1	1	0	1	1		100	83.3		524	599	785
		28	2009-06-19	2	2	12	12	8	8	1	0	1	0	1	1	1	0		100	100		719	913	785
		29	2009-06-20	2	2	12	12	8	8	1	1	1	0	1	1	1	1		100	100		492	1035	1350
		30	2009-06-22	2	2	12	12	8	8	1	0	1	0	1	0	1	1		100	100		555	702	1080
		31	2009-06-23	2	2	12	11	8	8	1	0	1	1	1	1	1	1		100	91.7		422	1483	961
		32	2009-06-24	2	2	12	11	8	8	1	0	1	1	1	1	1	1		100	91.7		430	758	904
		Average									28.1		37.5		87.5		25		100	92.7		623	843	904
